# Supplementary material
Source: PubMed Central journal article supplement (PMC8926412)
Supplement: mmc1.pdf [file mmc1.pdf]

# THE LANCET

## Respiratory Medicine

### Supplementary appendix

This appendix formed part of the original submission and has been peer reviewed. We post it as supplied by the authors.

Supplement to: Li J, Luo J, Pavlov I, et al. Awake prone positioning for non-intubated patients with COVID-19-related acute hypoxaemic respiratory failure: a systematic review and meta-analysis. *Lancet Respir Med* 2022; published online March 16. [https://doi.org/10.1016/S2213-2600\(22\)00043-1](https://doi.org/10.1016/S2213-2600(22)00043-1).

# Awake Prone Positioning for Non-intubated Patients with COVID-19 Related Acute Hypoxaemic Respiratory Failure: A Systematic Review and Meta-Analysis

## Supplementary appendix

Jie Li\*<sup>1</sup>, PhD; Jian Luo\*<sup>2</sup>, PhD; Ivan Pavlov\*<sup>3</sup>, MD; Yonatan Perez\*<sup>4</sup>, MD; Wei Tan\*<sup>5</sup>, PhD; Oriol Roca<sup>6,7</sup>, PhD; Elsa Tavernier<sup>8</sup>, PhD; Aileen Kharat<sup>9</sup>, MD; Bairbre McNicholas<sup>10</sup>, PhD; Miguel Ibarra-Estrada<sup>11</sup>, MD; Prof David L. Vines<sup>1</sup>, PhD; Nicholas A. Bosch<sup>12</sup>, MD; Garrett Rampon<sup>13</sup>, MD; Prof Steven Q. Simpson<sup>13</sup>, MD; Prof Allan J. Walkey<sup>12</sup>, MD; Michael Fralick<sup>14</sup>, MD; Amol Verma<sup>15</sup>, MD; Fahad Razak<sup>15</sup>, MD; Prof Tim Harris<sup>16</sup>, MD; Prof John G. Laffey<sup>#10</sup>, MD; Prof. Claude Guerin<sup>#17</sup>, PhD; Prof Stephan Ehrmann<sup>#18</sup>, PhD, for the Awake Prone Positioning Meta-Analysis Group†.

|                                                                                               |      |
|-----------------------------------------------------------------------------------------------|------|
| <b>1. Awake Prone Positioning Meta-Analysis Group</b>                                         |      |
| 1.1. Authors' contribution                                                                    | p 3  |
| 1.2. Investigators from each participating center                                             | p 4  |
| <b>2. Results</b>                                                                             |      |
| 2.1. Search strategy                                                                          | p 5  |
| 2.2. Reference list for the included non-RCTs                                                 | p 6  |
| 2.3. Table S1. Demographic details of the included non-RCTs                                   | p 8  |
| 2.4. Table S2. Comorbidities of the included RCTs                                             | p 10 |
| 2.5. Table S3. Comorbidities of the included non-RCTs                                         | p 11 |
| 2.6. Figure S1. Assessment on risk of bias for included RCTs                                  | p 12 |
| 2.7. Figure S2. Funnel plot of intubation for included RCTs                                   | p 13 |
| 2.8. Figure S3. Funnel plot of mortality for included RCTs                                    | p 14 |
| 2.9. Figure S4. Funnel plot of need for escalation of respiratory support for included RCTs   | p 15 |
| 2.10. Figure S5. Funnel plot of need for ICU admission for included RCTs                      | p 16 |
| 2.11. Figure S6. Funnel plot of ICU length of stay for included RCTs                          | p 17 |
| 2.12. Figure S7. Funnel plot of hospital length of stay for included RCTs                     | p 18 |
| 2.13. Table S4. Assessment on risk of bias for included non-RCTs using Newcastle-Ottawa Scale | p 19 |
| 2.14. Figure S8. Funnel plot of intubation for included non-RCTs                              | p 20 |
| 2.15. Figure S9. Funnel plot of mortality for included non-RCTs                               | p 21 |
| 2.16. Table S5. Grading of recommendations, assessment, development and evaluations (GRADE).  | p 22 |
| 2.17. Figure S10. Trial sequential analysis of intubation for included RCTs                   | p 23 |

|                                                                                                                                                          |      |
|----------------------------------------------------------------------------------------------------------------------------------------------------------|------|
| 2.18. Figure S11. Trial sequential analysis of intubation in subgroups of advanced respiratory support and conventional oxygen therapy for included RCTs | p 24 |
| 2.19. Figure S12. Trial sequential analysis of intubation in subgroups of ICU and non-ICU for included RCTs                                              | p 25 |
| 2.20. Figure S13. Intubation and mortality for Non-RCTs                                                                                                  | p 26 |
| 2.21. Figure S14. Subgroup analysis of mortality for included RCTs                                                                                       | p 27 |
| 2.22. Figure S15. Trial sequential analysis of mortality for included RCTs                                                                               | p 28 |
| 2.23. Figure S16. Trial sequential analysis of mortality in subgroups of advanced respiratory support and conventional oxygen therapy for included RCTs  | p 29 |
| 2.24. Figure S17. Trial sequential analysis of mortality in subgroups of ICU and non-ICU for included RCTs                                               | p 30 |
| 2.25. Figure S18. Meta-analysis of mortality for RCTs after exclusion of studies with small-study effects by trim-and-fill.                              | p 31 |
| 2.26. Figure S19. Meta-analysis of mortality for non-RCTs after exclusion of studies with small-study effects by trim-and-fill.                          | p 32 |
| 2.27. Figure S20. Secondary outcomes for included RCTs                                                                                                   | p 33 |
| 2.28. Figure S21. Subgroup analysis of need for escalation of respiratory support for included RCTs                                                      | p 34 |
| 2.29. Figure S22. Subgroup analysis of need for ICU admission for included RCTs                                                                          | p 35 |
| 2.30. Figure S23. Meta-analysis of need for ICU admission for RCTs after exclusion of studies with small-study effects by trim-and-fill.                 | p 36 |
| 2.31. Figure S24. Subgroup analysis of ICU length of stay for included RCTs                                                                              | p 37 |
| 2.32. Figure S25. Subgroup analysis of hospital length of stay for included RCTs                                                                         | p 38 |
| 2.33. Figure S26. Trial sequential analysis of need for escalation of respiratory support for included RCTs                                              | p 39 |
| 2.34. Figure S27. Trial sequential analysis of need for ICU admission for included RCTs                                                                  | p 40 |
| 2.35. Figure S28. Trial sequential analysis of ICU length of stay for included RCTs                                                                      | p 41 |
| 2.36. Figure S29. Trial sequential analysis of hospital length of stay for included RCTs                                                                 | p 42 |
| 2.37. Figure S30. Secondary outcomes for non-RCTs                                                                                                        | p 43 |
| 2.38. Table S6. Adverse events of included RCTs                                                                                                          | p 44 |
| 2.39. Table S7. Adverse events of included non-RCTs                                                                                                      | p 45 |
| 2.40. Table S8. Demographical details of the induced RCTs                                                                                                | p 46 |

## **1.1 Authors' contribution**

JLi, JGL, CG and SE designed the meta-analysis project.

Two independent groups of investigators (JLi, WT, JLuo on one hand and YP, IP on the other hand) performed literature search, screening, and data extraction.

JLi, IP, SE, and CG contacted trialists for clarification on their data and invited researchers to provide unpublished data.

MIE, DLV, AK, and BM participated in the resolution of discrepancies on data extraction.

JLi, JLuo, YP, IP, WT, and ET had full access to the data and verified the data.

JLuo and ET conducted data analysis.

All authors significantly contributed to the conduct of the meta-analysis.

JLi, JLuo, YP, IP, WT, MIE, DLV, AK, BM, ET, JGL, CG and SE attended bi-monthly web meetings.

JLi drafted the manuscript, all authors reviewed the manuscript for important intellectual content, and approved the final manuscript.

JLi, JLuo, YP, IP, and WT equally contributed to the overall project described in this article.

SE and JLi were responsible for the decision to submit the manuscript.

## 1.2 Investigators from each participating center

| Center                                                                                                                                                               | Investigators                        |
|----------------------------------------------------------------------------------------------------------------------------------------------------------------------|--------------------------------------|
| Rush University Medical Center, Chicago, IL, USA                                                                                                                     | Jie Li, Sara Mirza, David L. Vines   |
| University of Oxford, Oxford, United Kingdom                                                                                                                         | Jian Luo, Luzheng Xue, Ian D. Pavord |
| Hôpital de Verdun, Montréal, Québec, Canada                                                                                                                          | Ivan Pavlov, Patrice Plamondon       |
| Royal Victoria Hospital and Montreal General Hospital, both part of the McGill University Healthcare, Montréal, Québec, Canada                                       | Dev Jayaraman, Jason Shahin          |
| Hôpital de la Cité-de-la-Santé, Laval, Québec, Canada                                                                                                                | Joseph Dahine                        |
| Hôpital de Gaspé, Gaspé, Québec, Canada                                                                                                                              | Anne Kulenkamp                       |
| CHRU Tours, Hôpital Bretonneau, Tours France                                                                                                                         | Yonatan Perez, Stephan Ehrmann       |
| The First Affiliated Hospital, China Medical University, Shenyang, China                                                                                             | Wei Tan                              |
| Hospital Universitari Vall d'Hebron, Spain                                                                                                                           | Oriol Roca, Andrés Pacheco           |
| Clinical Investigation Center, INSERM 1415, CHRU Tours, Tours, France and Methods in Patients-Centered Outcomes and Health Research, INSERM UMR 1246, Nantes, France | Elsa Tavernier                       |
| Geneva University Hospital, Geneva, Switzerland                                                                                                                      | Aileen Kharat                        |
| Galway University Hospitals, Galway, Ireland                                                                                                                         | Bairbre McNicholas, John Laffey      |
| Hospital Civil Fray Antonio Alcalde. Guadalajara, Jalisco, México.                                                                                                   | Miguel Ibarra Estrada                |
| Boston University School of Medicine and Boston Medical Center, Boston, MA, United States                                                                            | Nicholas A. Bosch                    |
| University of Kansas Medical Center, Kansas City, KS, United States                                                                                                  | Garrett Rampon, Steven Q. Simpson    |
| Boston University School of Medicine and Boston Medical Center, Boston, MA, United States                                                                            | Allan J. Walkey                      |
| Sinai Health System, University of Toronto — both in Toronto, ON, Canada                                                                                             | Michael Fralick                      |
| St. Michael's Hospital, Unity Health Toronto, and University of Toronto, — all in Toronto, ON, Canada                                                                | Amol Verma, Fahad Razak              |
| Emergency Medicine Queen Mary University London, UK Consultant Emergency physician Hamad Medical Corporation, Qatar                                                  | Tim Harris                           |
| Hôpital Édouard Herriot, Lyon, France, and Université de Lyon, France, and Institut Mondor de Recherches Biomédicales INSERM 955 CNRS 7200 Créteil, France           | Claude Guerin                        |

## 2.1 Search strategy

(((((((((prone position[MeSH Terms]) OR ("prone positioning"[Title/Abstract])) OR ("Prone Positions"[Title/Abstract])) ) ) OR (PPV[Title/Abstract])) OR ("awake prone position"[Title/Abstract])) OR ("awake prone positioning"[Title/Abstract]))) AND (((((((((((("Oxygen inhalation therapy"[MeSH Terms]) OR ("Oxygen Inhalation"[Title/Abstract])) OR ("Oxygen therapy"[Title/Abstract])) OR ("Respiratory therapy"[Title/Abstract])) OR ("Non-intubated"[Title/Abstract])) OR ("Oxygen support"[Title/Abstract])) OR ("Oxygen supply"[Title/Abstract])) OR (awake[Title/Abstract])) OR ("spontaneous breath"[Title/Abstract])) OR (spontaneously breath[Title/Abstract])) OR (((HFNC[Title/Abstract]) OR ("high-flow nasal cannula"[Title/Abstract])) OR ("high-flow nasal oxygen"[Title/Abstract])) OR ("high-flow oxygen"[Title/Abstract]))) OR ((((((Noninvasive Ventilation[MeSH Terms]) OR (NIV[Title/Abstract])) OR (NIPPV[Title/Abstract])) OR ("Non-Invasive Ventilation"[Title/Abstract])) OR ("Non invasive Ventilation"[MeSH Terms])) OR (NPPV[Title/Abstract]))) OR ((prone position[MeSH Terms]) OR ("prone positioning"[Title/Abstract]) OR ("Prone Positions"[Title/Abstract]) OR ("awake prone position"[Title/Abstract]) OR ("awake prone positioning"[Title/Abstract])) AND ((COVID-19[MeSH Terms]) OR (SARS-CoV-2[MeSH Terms]))

## 2.2 Reference list for the included non-RCTs

1. Alsharif H, Belkhouja K. Feasibility and efficacy of prone position combined with cpap in COVID-19 patients with AHRF. *Critical Care Medicine* 2021; 49(1 SUPPL 1): 120.
2. Altınay M, Sayan I, Turk HS, Cinar AS, Sayın P, Yucel T, Islamoglu S, Ozkan MT, Cetiner I. Effect of early awake prone positioning application on prognosis in patients with acute respiratory failure due to COVID-19 pneumonia: a retrospective observational study. *Braz J Anesthesiol* 2021; Aug 16:S0104-0014(21)00318-3.
3. Barker J, Pan D, Koeckerling D, Baldwin AJ, West R. Effect of serial awake prone positioning on oxygenation in patients admitted to intensive care with COVID-19. *Postgraduate Medical Journal* 2021.
4. Fazzini B, Fowler AJ, Zolfaghari P. Effectiveness of prone position in spontaneously breathing patients with COVID-19: A prospective cohort study. *Journal of the Intensive Care Society* 2021.
5. Ferrando C, Mellado-Artigas R, Gea A, et al. Awake prone positioning does not reduce the risk of intubation in COVID-19 treated with high-flow nasal oxygen therapy: A multicenter, adjusted cohort study. *Critical Care* 2020; 24:597.
6. Jagan N, Morrow LE, Walters RW, et al. The POSITIONED Study: Prone Positioning in Nonventilated Coronavirus Disease 2019 Patients-A Retrospective Analysis. *Crit Care Explor* 2020; 2: e0229.
7. Padrao EMH, Valente FS, Besen B, et al. Awake Prone Positioning in COVID-19 Hypoxemic Respiratory Failure: Exploratory Findings in a Single-center Retrospective Cohort Study. *Academic Emergency Medicine* 2020; 27: 1249-59.
8. Jouffroy R, Darmon M, Isnard F, et al. Impact of prone position in non-intubated spontaneously breathing patients admitted to the ICU for severe acute respiratory failure due to COVID-19. *Journal of Critical Care* 2021; 64: 199-204.
9. Loureiro-Amigo J, Suárez-Carantoña C, Oriol I, et al. Prone Position in COVID-19 Patients With Severe Acute Respiratory Distress Syndrome Receiving Conventional Oxygen Therapy: A Retrospective Study. *Archivos de Bronconeumologia* 2021.
10. Meredith S, Bhat P, Ahmed MA, Singh K. A retrospective analysis of the effect of self proning on disease progression in COVID-19 patients. *American Journal of Respiratory and Critical Care Medicine* 2021; 203.

11. Ni Z, Wang K, Wang T, et al. Efficacy of early prone or lateral positioning in patients with severe COVID-19: A single-center prospective cohort. *Precision Clinical Medicine* 2020; 3: 260-71.
12. Pierucci P, Ambrosino N, Di Lecce V, et al. Prolonged Active Prone Positioning in Spontaneously Breathing Non-intubated Patients With COVID-19-Associated Hypoxemic Acute Respiratory Failure With PaO<sub>2</sub>/FiO<sub>2</sub> >150. *Frontiers in Medicine* 2021; 8.
13. Perez-Nieto OR, Escarraman-Martinez D, Guerrero-Gutierrez MA, et al. Awake prone positioning and oxygen therapy in patients with COVID-19: The APRONOX study. *The European respiratory journal* 2021.
14. Sryma PB, Mittal S, Mohan A, et al. Effect of proning in patients with COVID-19 acute hypoxemic respiratory failure receiving noninvasive oxygen therapy. *Lung India* 2021; 38(Supplement): S6-10.
15. Vianello A, Turrin M, Guarnieri G, et al. Prone positioning is safe and may reduce the rate of intubation in selected covid-19 patients receiving high-flow nasal oxygen therapy. *Journal of Clinical Medicine* 2021; 10.
16. Prud'homme E, Trigui Y, Elharrar X, et al. Effect of Prone Positioning on the Respiratory Support of Nonintubated Patients With COVID-19 and Acute Hypoxemic Respiratory Failure: A Retrospective Matching Cohort Study. *Chest* 2021; 16: 85-8.
17. Simioli F, Annunziata A, Langella G, Martino M, Musella S, Fiorentino G. Early prone positioning and non-invasive ventilation in a critical covid-19 subset. A single centre experience in southern italy. *Turkish Thoracic Journal* 2021; 22: 57-61.
18. Tonelli R, Pisani L, Tabbi L, et al. Early awake proning in critical and severe COVID-19 patients undergoing noninvasive respiratory support: A retrospective multicenter cohort study. *Pulmonology* 2021.
19. Zang X, Wang Q, Zhou H, Liu S, Xue X. COVID-19 Early Prone Position Study Group. Efficacy of early prone position for COVID-19 patients with severe hypoxia: a single-center prospective cohort study. *Intensive Care Med* 2020; 46(10):1927-29.



**Table S1. Demographic details of the included non-RCTs.**

| Author, year   | Country                 | Enrolment location | Study design                          | Interventions                                                           | Population | Targeting duration of APP                                                             | Actual duration of APP (hours) | Age (years) | Sex (Male, %)    | BMI (kg/m <sup>2</sup> ) | Baseline P/F or S/F* | Use of corticosteroids (n, %) | Primary outcomes                         | Secondary outcomes                                                                                                                                                                    |
|----------------|-------------------------|--------------------|---------------------------------------|-------------------------------------------------------------------------|------------|---------------------------------------------------------------------------------------|--------------------------------|-------------|------------------|--------------------------|----------------------|-------------------------------|------------------------------------------|---------------------------------------------------------------------------------------------------------------------------------------------------------------------------------------|
| Alsharif, 2021 | Kingdom of Saudi Arabia |                    | Non RCT, single center, prospective   | Usual care (CPAP)                                                       | 48         |                                                                                       |                                |             |                  |                          |                      |                               | The rate of tracheal intubation          | The rate of ICU mortality, the length of stay, and the rate of Healthcare Workers infected by SARS-CoV2                                                                               |
|                |                         |                    |                                       | Usual care (CPAP)+APP                                                   | 31         |                                                                                       |                                |             |                  |                          |                      |                               |                                          |                                                                                                                                                                                       |
| Altınay, 2021  | Turkey                  | ICU                | Non RCT, single center, retrospective | Usual care (NRM)                                                        | 23         |                                                                                       |                                | 72.6±10.1   | 9 (39.1)         | 26.6±3.1                 | 167.6 (159.5-213.5)  |                               | The rate of tracheal intubation          | Ventilation free days, length of ICU stay, mortality at 28 days of ICU stay, post intensive care hospitalization or home discharge                                                    |
|                |                         |                    |                                       | Usual care (NRM)+APP                                                    | 25         | 18 hours/day intermittently                                                           | 62.4±10.9                      | 11 (44.0)   | 25.1±2.5         | 175.7 (156.8-193.2)      |                      |                               |                                          |                                                                                                                                                                                       |
| Barker, 2021   | UK                      | ICU                | Non RCT, single center, retrospective | Usual care (NIV)                                                        | 10         |                                                                                       |                                | 64±10       | 6 (60.0)         |                          |                      |                               | S/F, recorded after each APP             | Admission ISARIC COVID-19 4C mortality score, ICU length of stay, escalation to IMV, and 28-day mortality                                                                             |
|                |                         |                    |                                       | Usual care (NIV)+APP                                                    | 10         | As long as possible                                                                   | 59±6                           | 6 (60.0)    |                  |                          |                      |                               |                                          |                                                                                                                                                                                       |
| Fazzini, 2021  | UK                      | General ward       | Non RCT, single center, prospective   | Usual care (HFNC/Facemask/CPAP)+APP<1h                                  | 12         |                                                                                       |                                | 56 (30-79)  |                  |                          |                      |                               | Change in P/F and S/F                    | Change in respiratory rate, work of breathing, shortness of breath, ICU admission, endotracheal intubation, hospital length of stay, 90-day mortality                                 |
|                |                         |                    |                                       | Usual care (HFNC/Facemask/CPAP)+APP>1h                                  | 34         | As long as tolerated                                                                  | 56 (22-77)                     |             |                  |                          |                      |                               |                                          |                                                                                                                                                                                       |
| Ferrando, 2020 | Spain                   | ICU                | Non RCT, multicenter, prospective     | Usual care (HFNC)                                                       | 144        |                                                                                       |                                | 63 (55-71)  | 104 (72.7)       | 27.3 (25.1-29.4)         | 111.0 (83.0-144.0)   |                               | Need for invasive mechanical ventilation | Time from onset of symptoms and from hospital admission to initiation of respiratory support, ICU length of stay, and ICU mortality                                                   |
|                |                         |                    |                                       | Usual care (HFNC)+APP                                                   | 55         | >16 hours/day regardless of the number of sessions                                    | 60 (54-70)                     | 41 (75.9)   | 26.8 (24.8-31.2) | 125.0 (99.0-187.0)       |                      |                               |                                          |                                                                                                                                                                                       |
| Jagan, 2020    | USA                     |                    | Non RCT, single center, retrospective | APP<1h or <5 occasions per day and for <= 1 continuous hour overnight   | 65         |                                                                                       |                                | 65.8 ± 16.3 | 37 (56.9)        | 28.0 (24.9-34.4)         |                      |                               | The need for intubation                  | Mortality, time to intubation, and changes in S/F, need for ICU admission, ICU length of stay, hospital length of stay, and discharge disposition                                     |
|                |                         |                    |                                       | APP>=1h or >=5 occasions per day and for >= 1 continuous hour overnight | 40         | >= 1 continuous hour or >= 5 occasions per day and for >= 1 continuous hour overnight | 56.0 ± 14.4                    | 20 (50.0)   | 31.3 (26.4-37.5) |                          |                      |                               |                                          |                                                                                                                                                                                       |
| Padrão, 2020   | Brazil                  | ED                 | Non RCT, single center, retrospective | Usual care (Nasal cannula/Venturi mask/NRM)                             | 109        |                                                                                       |                                | 61.4 ± 13.6 | 72 (66)          |                          |                      | 4 (3.7)                       | Endotracheal intubation up to 15 days    | 6-point clinical outcome ordinal scale, mechanical ventilation-free days, admission to ICU, and need of hemodialysis and of vasoactive drugs, improvement in RR, SpO2, S/F, ROX index |
|                |                         |                    |                                       | Usual care (Nasal cannula/Venturi mask/NRM)+APP                         | 57         | At least 4 hours in their first session and then twice daily                          | 51.8±13                        | 40 (70)     |                  |                          |                      |                               |                                          |                                                                                                                                                                                       |
| Jouffroy, 2021 | France                  | ICU                | Non RCT, multicenter, retrospective   | Usual care (COT/HFNC/NIV/CPAP)                                          | 339        |                                                                                       |                                | 62 (53–69)  | 255 (75.2)       | 28 (25-32)               | 138 (98-196)         |                               | Intubation at day 10                     | Intubation at day 28, intubation until ICU discharge, day-28 mortality                                                                                                                |
|                |                         |                    |                                       | Usual care (COT/HFNC/CPA P)+APP                                         | 40         | Between 3 and 6 hours per session twice daily physiotherapy.                          | 59.5 (56–64)                   | 36 (90.0)   | 28.5 (26-31)     | 90 (71-125)              |                      |                               |                                          |                                                                                                                                                                                       |

**Table S1. Demographic details of the included non-RCTs. (Continued)**

| Author, year         | Country        | Enrolment location              | Study design                          | Interventions                           | Population | Targeting duration of APP                                                     | Actual duration of APP (hours) | Age (years)      | Sex (Male, %) | BMI (kg/m <sup>2</sup> ) | Baseline P/F or S/F* | Use of corticosteroids (n, %) | Primary outcomes                                                                       | Secondary outcomes                                                                                                                                                                                                                  |
|----------------------|----------------|---------------------------------|---------------------------------------|-----------------------------------------|------------|-------------------------------------------------------------------------------|--------------------------------|------------------|---------------|--------------------------|----------------------|-------------------------------|----------------------------------------------------------------------------------------|-------------------------------------------------------------------------------------------------------------------------------------------------------------------------------------------------------------------------------------|
| Loureiro-Amigo, 2021 | Spain          | Non-ICU                         | Non RCT, multicenter, retrospective   | Usual care                              | 103        |                                                                               |                                | 70.8 (60.6-74.2) | 71 (68.9)     |                          | 400 (241.7-438.1)*   | 62 (60.2)                     | Death during hospitalization                                                           | None                                                                                                                                                                                                                                |
|                      |                |                                 |                                       | Usual care+APP                          | 60         | APP was used at least one day                                                 |                                | 66.6 (59.2-72.4) | 43 (71.7)     |                          | 409.5 (306.3-438.1)* |                               |                                                                                        |                                                                                                                                                                                                                                     |
| Meredith, 2021       | USA            | ICU                             | Non RCT, single center, retrospective | Usual care                              | 87         |                                                                               |                                |                  |               |                          |                      |                               | Rate of intubation                                                                     | Time to mechanical ventilation in days, amount of respiratory support required (defined as: oxygen requirement, nasal cannula, HFNC, NIPPV, and mechanical ventilation), time at this maximal therapy in days, and number of deaths |
| Ni, 2020             | China          | ICU                             | Non RCT, single center, prospective   | Usual care                              | 35         |                                                                               |                                | 64±12            | 21 (60.0)     |                          | 128±60               | 22 (62.9)                     | Oxygenation improvement (cumulative mean difference of S/F, ROX index, and Borg scale) | Lung lesion absorption, NEWS2, time to clinical improvement, rate of intubation avoidance, death, time to virus shredding, length of hospital stay, and adverse events                                                              |
|                      |                |                                 |                                       | Usual care+APP                          | 20         | At least 4 hours per day for 10 days                                          |                                | 60±12            | 12 (60.0)     |                          | 147±51               |                               |                                                                                        |                                                                                                                                                                                                                                     |
| Pierucci, 2021       | Italy          | Intermediate care unit          | Non RCT, single center, retrospective | Usual care (HFNC/CPAP/NIV)              | 16         |                                                                               |                                | 70 ± 15          | 10 (62)       |                          | 179±18               |                               | The proportion of patients on prolonged prone position and discharged home             | Improvement in oxygenation, hospital length of stay, and 6-month survival                                                                                                                                                           |
|                      |                |                                 |                                       | Usual care (HFNC/CPAP/NIV)+APP          | 16         | As long as possible                                                           |                                | 59 ± 11          | 13 (81)       |                          | 226±74               |                               |                                                                                        |                                                                                                                                                                                                                                     |
| Perez-Nieto, 2021    | Mexico-Ecuador | ED, Intermediate care unit, ICU | Non RCT, multicenter, retrospective   | Usual care (Nasal cannula/NRM/HFNC)     | 322        |                                                                               |                                | 55.8±14.5        | 230 (71.4)    |                          |                      | 69 (21.4)                     | Intubation for mechanical ventilation                                                  | Death during in-hospital follow-up, factors associated with intubation amongst patients in the APP group                                                                                                                            |
|                      |                |                                 |                                       | Usual care (Nasal cannula/NRM/HFNC)+APP | 505        | At least 2 continuous hours                                                   | Total: 12 (8-24)               | 53.4 ±13.9       | 370 (73.3)    |                          | 84 (16.6)            |                               |                                                                                        |                                                                                                                                                                                                                                     |
| Sryma, 2021          | India          |                                 | Non RCT, single center, prospective   | Usual care (COT/HFNC/NIV)               | 15         |                                                                               |                                | 57.5±12.2        | 9 (60.0)      |                          |                      | 13 (86.7)                     | The rate of intubation                                                                 | ROX index at 30 min from the start of the intervention, ROX index at 12 h, days to the recovery of hypoxia (defined as room air SpO <sub>2</sub> >93%), and mortality                                                               |
|                      |                |                                 |                                       | Usual care (COT/HFNC/NIV)+APP           | 30         | A minimum of 2 hours per session with a target of duration of 8 hours per day |                                | 50.9±10.1        | 29 (96.7)     |                          | 26 (86.7)            |                               |                                                                                        |                                                                                                                                                                                                                                     |
| Vianello, 2021       | Italy          | Intermediate care unit          | Non RCT, single center, prospective   | Usual care (HFNC)                       | 43         |                                                                               |                                | 69 (37-86)       | 26 (60.5)     | 28.3 (22.9-33.3)         | 92.4 (52.4-240.9)    | 43 (100.0)                    | Rate of intubation                                                                     | Rate of escalation of respiratory support, i.e., NIV or ETI; In-hospital mortality rate; Length of hospital stay                                                                                                                    |
|                      |                |                                 |                                       | Usual care (HFNC)+APP                   | 50         | At least 2 consecutive hours                                                  |                                | 67 (36-89)       | 33 (66.0)     | 26.9 (20.8-41.5)         | 107.2 (6.8-300.0)    |                               |                                                                                        |                                                                                                                                                                                                                                     |
| Prud'homme, 2021     | France         | Non-ICU                         | Non RCT, multicenter, retrospective   | Usual care (COT/HFNC)                   | 48         |                                                                               |                                | 61±18            | 31 (64.6)     | 28±5                     | 299±45*              | 28 (58.3)                     | Upgrading of oxygen delivery method on day 14                                          | Death at day 14                                                                                                                                                                                                                     |
|                      |                |                                 |                                       | Usual care (COT/HFNC)+APP               | 48         | At least 3 hours each day during 3 consecutive days                           |                                | 62±11            | 37 (77.1)     | 27±5                     | 279±84*              |                               |                                                                                        |                                                                                                                                                                                                                                     |
| Simioli, 2021        | Italy          | Intermediate care unit          | Non RCT, single center, retrospective | Usual care (HFNC/CPAP)                  | 11         |                                                                               | Daily: 3h                      | 71±10            |               | 28±5                     | 95±92                |                               |                                                                                        |                                                                                                                                                                                                                                     |
|                      |                |                                 |                                       | Usual care (HFNC/CPAP)+APP              | 18         |                                                                               | Daily: >10h                    | 61±14            |               | 28±2                     | 96.5±35              |                               |                                                                                        |                                                                                                                                                                                                                                     |
| Tonelli, 2021        | Italy          | ICU                             | Non RCT, multicenter, retrospective   | Usual care (HFNC/NIV)                   | 76         |                                                                               |                                | 70 (33-80)       | 55 (73)       | 28 (20-37)               | 153 (84-232)         | 55 (73)                       | Endotracheal intubation rate                                                           | Time to intubation, mortality, non invasive respiratory support-free-days (i.e. days spent without HFNC, NIV, CPAP, or invasive mechanical ventilation at 1-month), tracheostomy, length of RICU and hospital stay                  |
|                      |                |                                 |                                       | Usual Care (HFNC/NIV)+APP               | 38         | At least 3 hours per session with 1-4 sessions per day                        |                                | 61 (32-75)       | 25 (66)       | 26 (19-36)               | 141 (73-223)         |                               |                                                                                        |                                                                                                                                                                                                                                     |
| Zang, 2020           | China          | ICU                             | Non RCT, single center, prospective   | Usual care (Face mask)                  | 37         |                                                                               |                                | 66.14±9.19       | 26 (70.3)     |                          |                      |                               |                                                                                        |                                                                                                                                                                                                                                     |
|                      |                |                                 |                                       | Usual care (Face mask)+APP              | 23         |                                                                               | 13.43±8.04                     | 62.65±10.83      | 13 (56.5)     |                          |                      |                               |                                                                                        |                                                                                                                                                                                                                                     |

Data was presented as mean±SD or median (IQR). Missing data was presented as blank. \* Data was shown at S/F. APP, awake prone positioning; BMI, body mass index; COT, conventional oxygen therapy; CPAP, continuous positive airway pressure; ED, emergency department; ETI, endotracheal intubation; HFNC, high flow nasal cannula; HFNO, high-flow nasal oxygen therapy; ICU, intensive care unit; IMV, invasive mechanical ventilation; NEWS2, National Early Warning Score 2; NIPPV, non-invasive positive pressure ventilation; NIV, non-invasive ventilation; NRM, non-rebreather mask; P/F, ratio of partial pressure of arterial oxygen to fraction of inhaled oxygen; RICU, respiratory intensive care unit; RR, respiratory rate; S/F, ratio of pulse oxygen saturation to fraction of inhaled oxygen; SpO<sub>2</sub>, pulse oxygen saturation.

**Table S2. Comorbidities of the included RCTs.**

| Author, year            | Interventions                                            | Population | Hypertension<br>(n, %) | COPD<br>(n, %) | Chronic kidney disease<br>(n, %) | Severe liver disease<br>(n, %) | Diabetes<br>(n, %) | Cancer<br>(n, %) |
|-------------------------|----------------------------------------------------------|------------|------------------------|----------------|----------------------------------|--------------------------------|--------------------|------------------|
| Appex,<br>Unpublished   | COT (Room air/Nasal cannula/Mask/HFNC)                   | 134        | 62 (46·3)              | 14 (10·4)      |                                  |                                | 39 (29·1)          | 9 (6·7)          |
|                         | COT (Room air/Nasal cannula/Mask/HFNC) +APP              | 159        | 76 (47·8)              | 16 (10·1)      |                                  |                                | 45 (28·3)          | 6 (3·8)          |
| Ehrmann, 2021           | HFNC                                                     | 557        |                        |                | 35 (6)                           | 6 (1)                          | 173 (31)           | 31 (6)           |
|                         | HFNC+APP                                                 | 564        |                        |                | 45 (8)                           | 8 (1)                          | 176 (31)           | 45 (8)           |
| Gad, 2021               | NRM                                                      | 15         | 3 (20·0)               | 3 (20·0)       |                                  |                                | 6 (33·3)           |                  |
|                         | NRM+APP                                                  | 15         | 4 (26·7)               | 5 (33·3)       |                                  |                                | 7 (46·7)           |                  |
| Jayakumar, 2021         | Standard care (Face mask/NRM)                            | 30         | 9 (30·0)               |                |                                  |                                | 19 (63·3)          |                  |
|                         | Standard care (Nasal Prongs/Face mask/NRM/HFNC/NIV) +APP | 30         | 13 (43·3)              |                |                                  |                                | 13 (43·3)          |                  |
| Johnson, 2021           | Usual care (Room air/ nasal cannula)                     | 15         |                        |                |                                  |                                |                    |                  |
|                         | Usual care (Room air/nasal cannula)+APP                  | 15         |                        |                |                                  |                                |                    |                  |
| Kharat, 2021            | Usual care (Nasal cannula)                               | 17         | 9 (52·9)               | 0 (0)          | 1 (5·9)                          |                                | 3 (17·6)           |                  |
|                         | Usual care (Nasal cannula) +APP                          | 10         | 3 (30·0)               | 0 (0)          | 0 (0)                            |                                | 2 (20·0)           |                  |
| Rosén, 2021             | HFNC/NIV                                                 | 39         | 21 (55)                | 4 (10)         | 2 (5·1)                          | 1 (3)                          | 11 (28·2)          | 1 (3)            |
|                         | HFNC/NIV+APP                                             | 36         | 17 (47)                | 2 (6)          | 3 (8·3)                          | 0 (0)                          | 14 (38·9)          | 4 (11)           |
| Taylor, 2021            | Usual care (Room air/ nasal cannula/HFNC/NIV)            | 13         |                        |                | 2 (15·4)                         |                                | 5 (38·5)           |                  |
|                         | Usual care (Nasal cannula/HFNC/NIV) +APP                 | 27         |                        |                | 7 (25·9)                         |                                | 10 (37·0)          |                  |
| Harris,<br>Unpublished  | Usual care (Nasal cannula/NRM/HFNC/NIV)                  | 30         | 3 (10·0)               | 0 (0)          |                                  | 0 (0)                          | 10 (33·3)          | 0 (0)            |
|                         | Usual care (Nasal cannula/NRM/HFNC/NIV) +APP             | 31         | 6 (19·4)               | 0 (0)          |                                  | 1 (3·2)                        | 14 (45·2)          | 0 (0)            |
| Fralick,<br>Unpublished | Standard care (Nasal cannula/ venturi mask/HFNC)         | 122        | 42 (34·4)              | 15 (12·3)      |                                  |                                | 31 (25·4)          |                  |
|                         | Standard care (Nasal cannula/ venturi mask/HFNC) +APP    | 126        | 56 (44·4)              | 12 (9·5)       |                                  |                                | 36 (28·6)          |                  |

Missing data was presented as blank. APP, awake prone positioning; COPD, chronic obstructive pulmonary disease; COT, conventional oxygen therapy; HFNC, high-flow nasal cannula; NIV, non-invasive ventilation; NRM, non-rebreather mask; RCT, randomised controlled trial.

**Table S3. Comorbidities of the included non-RCTs.**

| Author, year         | Interventions                                                            | Population | Hypertension<br>(n, %) | COPD<br>(n, %) | Chronic kidney disease<br>(n, %) | Severe liver disease<br>(N, %) | Diabetes<br>(n, %) | Cancer<br>(n, %) |
|----------------------|--------------------------------------------------------------------------|------------|------------------------|----------------|----------------------------------|--------------------------------|--------------------|------------------|
| Alsharif, 2021       | Usual care (CPAP)                                                        | 48         |                        |                |                                  |                                |                    |                  |
|                      | Usual care (CPAP)+APP                                                    | 31         |                        |                |                                  |                                |                    |                  |
| Altinay, 2021        | Usual care (NRM)                                                         | 23         | 15 (65.2)              | 0 (0)          | 1 (4.3)                          |                                | 6 (26.1)           | 2 (8.7)          |
|                      | Usual care (NRM)+APP                                                     | 25         | 10 (40.0)              | 2 (8.0)        | 0 (0)                            |                                | 10 (40.0)          | 0 (0)            |
| Barker, 2021         | Usual care (NIV)                                                         | 10         |                        |                |                                  |                                |                    |                  |
|                      | Usual care (NIV)+APP                                                     | 10         |                        |                |                                  |                                |                    |                  |
| Fazzini, 2021        | Usual care (HFNC/Facemask/CPAP)+APP<1h                                   | 12         |                        |                |                                  |                                |                    |                  |
|                      | Usual care (HFNC/Facemask/CPAP)+APP>1h                                   | 34         |                        |                |                                  |                                |                    |                  |
| Ferrando, 2020       | Usual care (HFNC)                                                        | 144        | 60 (41.7)              | 6 (4.2)        | 14 (9.7)                         |                                | 23 (16.0)          | 9 (6.3)          |
|                      | Usual care (HFNC)+APP                                                    | 55         | 20 (36.4)              | 4 (7.3)        | 4 (7.3)                          |                                | 9 (16.4)           | 3 (5.5)          |
| Jagan, 2020          | APP<1h or <5 occasions per day and for <= 1 continuous hour overnight    | 65         | 36 (55.4)              | 11 (16.9)      | 15 (23.1)                        |                                | 25 (38.5)          | 6 (9.2)          |
|                      | APP>=1h orn >=5 occasions per day and for >= 1 continuous hour overnight | 40         | 24 (60)                | 5 (12.5)       | 5 (12.5)                         |                                | 18 (45.0)          | 3 (7.5)          |
| Padrão, 2020         | Usual care (Nasal cannula/Venturi mask/NRM)                              | 109        | 62 (57)                |                |                                  |                                | 36 (33.0)          | 6 (6)            |
|                      | Usual care (Nasal cannula/Venturi mask/NRM)+APP                          | 57         | 27 (47)                |                |                                  |                                | 22 (38.6)          | 1 (2)            |
| Jouffroy, 2021       | Usual care (COT/HFNC/NIV/CPAP)                                           | 339        | 175 (51.6)             | 17 (5.0)       | 63 (18.6)                        |                                | 103 (30.4)         |                  |
|                      | Usual care (COT/HFNC/CPAP)+APP                                           | 40         | 13 (32.5)              | 3 (7.5)        | 2 (5.0)                          |                                | 11 (27.5)          |                  |
| Loureiro-Amigo, 2021 | Usual care                                                               | 103        | 64 (62.1)              | 16 (15.5)      |                                  |                                | 38 (36.9)          |                  |
|                      | Usual care+APP                                                           | 60         | 35 (58.3)              | 5 (8.3)        |                                  |                                | 19 (31.7)          |                  |
| Meredith, 2020       | Non-self proning                                                         | 87         |                        |                |                                  |                                |                    |                  |
|                      | Self-proning                                                             | 26         |                        |                |                                  |                                |                    |                  |
| Ni, 2021             | Usual care                                                               | 35         | 10 (28.6)              | 3 (8.6)        |                                  |                                | 7 (20.0)           |                  |
|                      | Usual care+APP                                                           | 20         | 7 (41.2)               | 3 (15)         |                                  |                                | 5 (25)             |                  |
| Pierucci, 2021       | Usual care (HFNC/CPAP/NIV)                                               | 16         | 11 (68.8)              |                | 6 (37.5)                         |                                | 4 (25.0)           |                  |
|                      | Usual care (HFNC/CPAP/NIV)+APP                                           | 16         | 5 (31.2)               | 0 (0)          | 5 (31.2)                         |                                | 3 (18.8)           |                  |
| Perez-Nieto, 2021    | Usual care (Nasal cannula/NRM/HFNC)                                      | 322        | 119 (37)               |                | 12 (3.7)                         | 3 (0.9)                        | 121 (37.6)         | 8 (2.5)          |
|                      | Usual care (Nasal cannula/NRM/HFNC) +APP                                 | 505        | 166 (32.9)             |                | 23 (4.6)                         | 2 (0.4)                        | 194 (38.4)         | 2 (0.4)          |
| Sryma, 2021          | Usual care (COT/HFNC/NIV)                                                | 15         | 7 (46.7)               |                |                                  |                                | 9 (60.0)           |                  |
|                      | Usual care (COT/HFNC/NIV)+APP                                            | 30         | 12 (40.0)              |                |                                  |                                | 11 (36.7)          |                  |
| Vianello, 2021       | Usual care (HFNC)                                                        | 43         |                        |                |                                  |                                |                    |                  |
|                      | Usual care (HFNC)+APP                                                    | 50         |                        |                |                                  |                                |                    |                  |
| Prud'homme, 2021     | Usual care (COT/HFNC)                                                    | 48         | 18 (37.5)              |                |                                  |                                | 12 (25.0)          |                  |
|                      | Usual care (COT/HFNC)+APP                                                | 48         | 15 (31.3)              |                |                                  |                                | 7 (14.6)           |                  |
| Simioli, 2021        | Usual care (HFNC/CPAP)                                                   | 11         |                        |                |                                  |                                |                    |                  |
|                      | Usual care (HFNC/CPAP)+APP                                               | 18         |                        |                |                                  |                                |                    |                  |
| Tonelli, 2021        | Usual care (HFNC/NIV)                                                    | 76         | 60 (79)                | 11 (15)        | 8 (10)                           |                                | 14 (18)            | 8 (11)           |
|                      | Usual care (HFNC/NIV)+APP                                                | 38         | 32 (84)                | 6 (16)         | 2 (6)                            |                                | 8 (23)             | 4 (11)           |
| Zang, 2020           | Usual care (Face mask)                                                   | 37         | 17 (45.9)              |                |                                  |                                | 9 (24.3)           |                  |
|                      | Usual care (Face mask)+APP                                               | 23         | 6 (26.1)               |                |                                  |                                | 3 (13.0)           |                  |

Missing data was presented as blank. APP, awake prone positioning; COPD, chronic obstructive pulmonary disease; COT, conventional oxygen therapy; CPAP, continuous positive airway pressure; HFNC, high-flow nasal cannula; NIV, non-invasive ventilation; NRM, non-rebreather mask; RCT, randomised controlled trial.

**Figure S1. Assessment on risk of bias for included RCTs.**

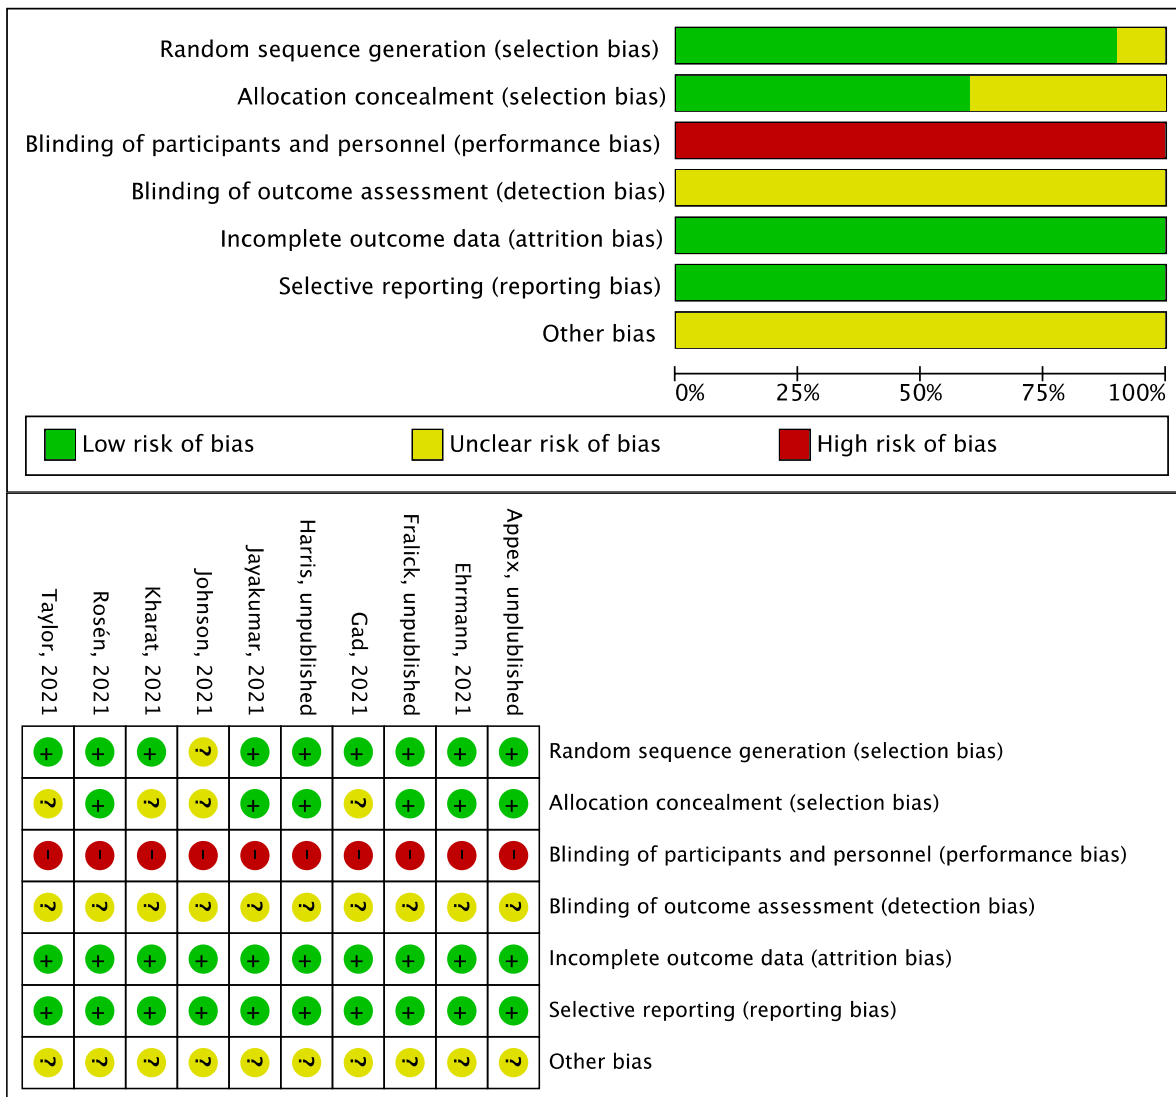

**Figure S2. Funnel plot of intubation for included RCTs.**

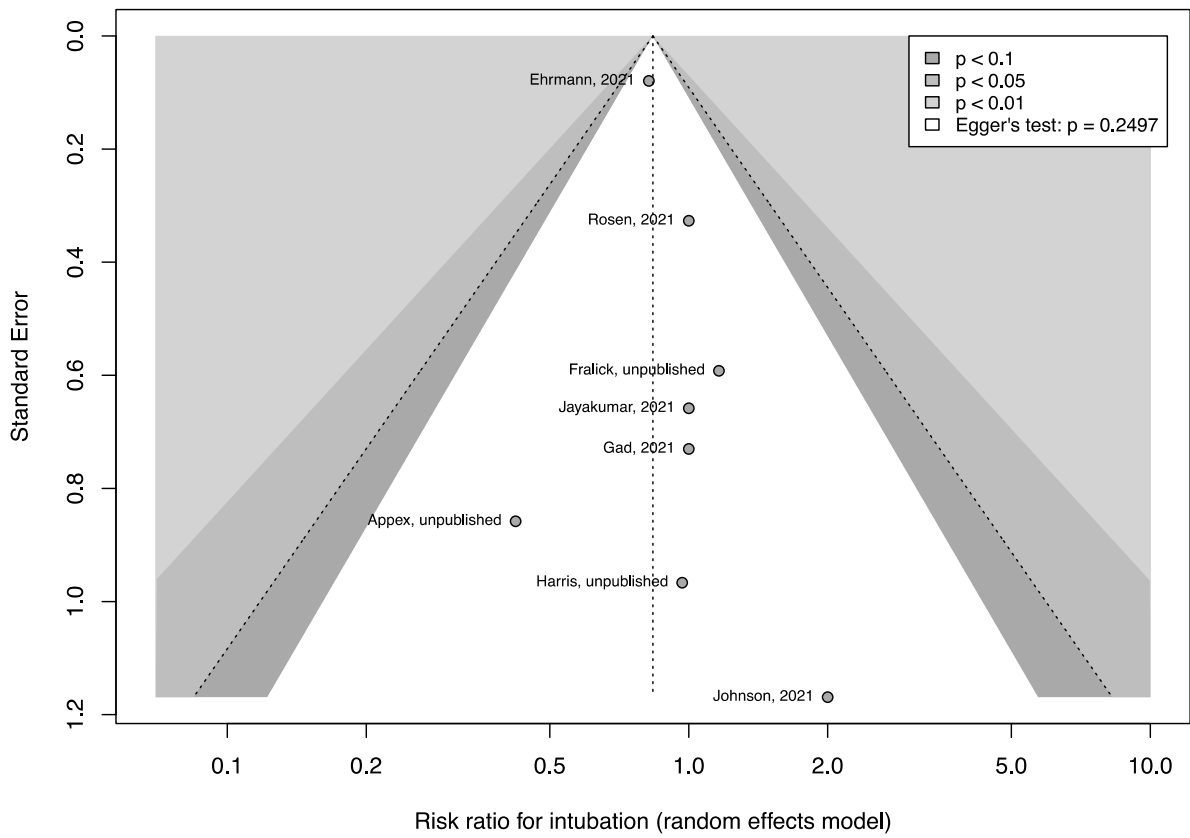

**Figure S3. Funnel plot of mortality for included RCTs.**

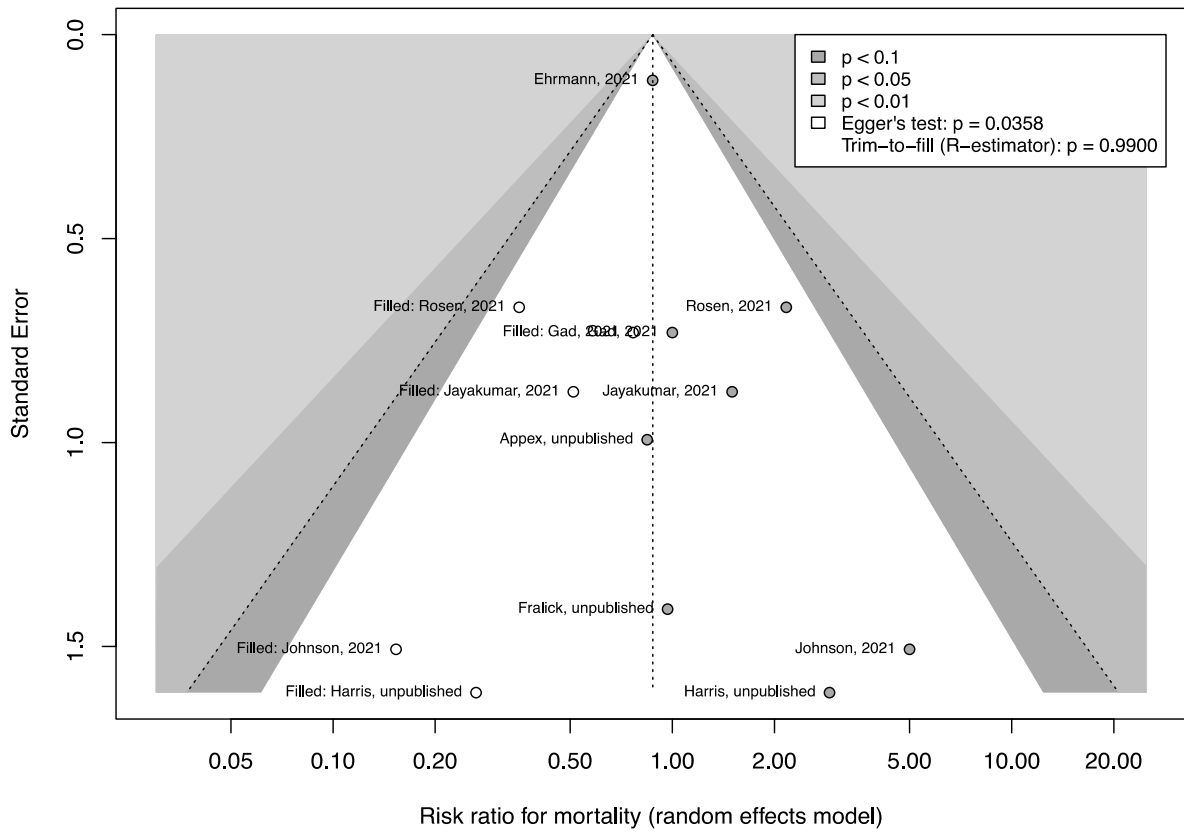

**Figure S4. Funnel plot of need for escalation of respiratory support for included RCTs.**

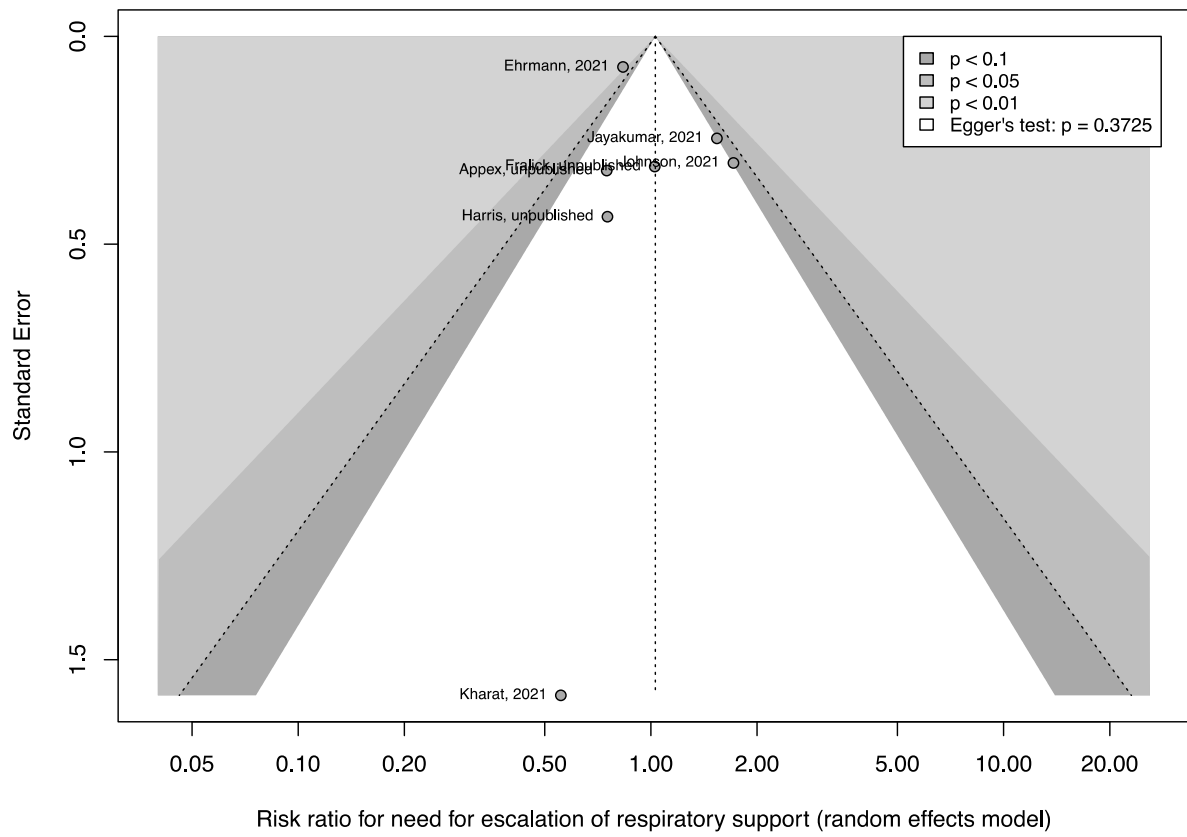



**Figure S5. Funnel plot of need for ICU admission for included RCTs.**

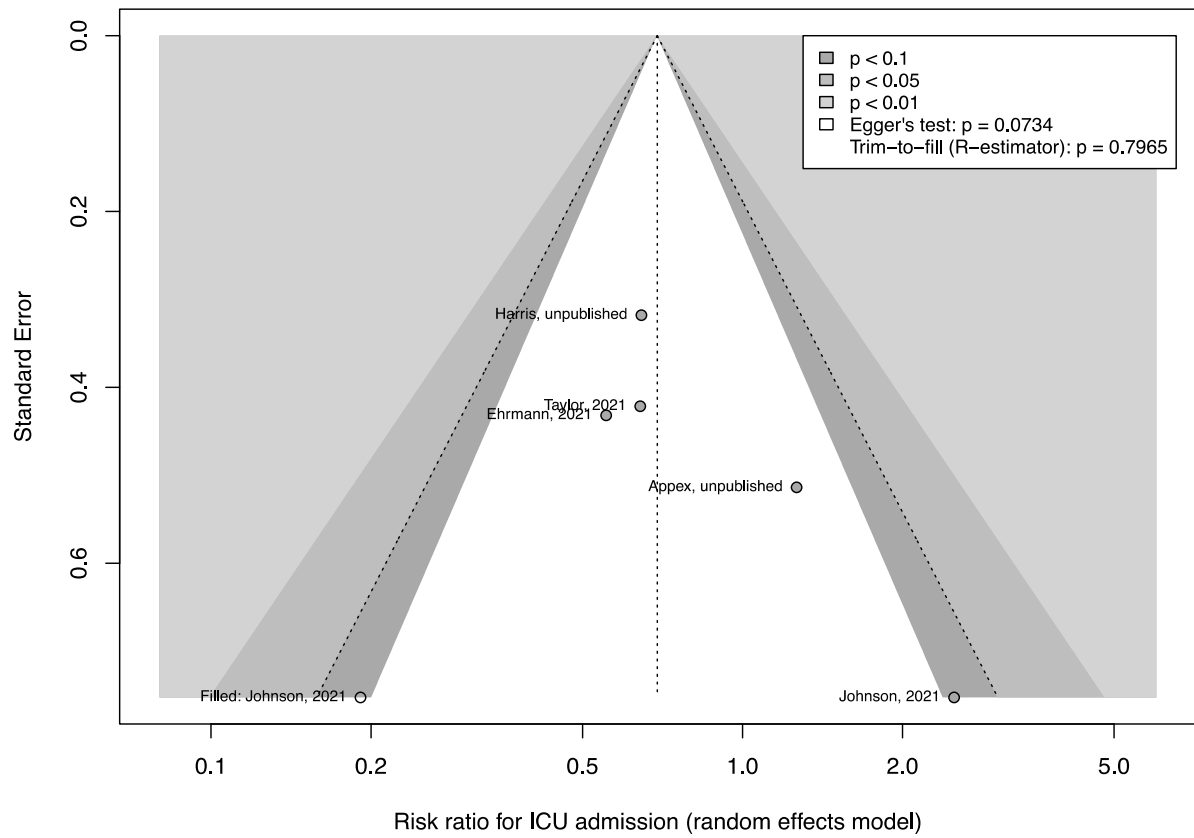

**Figure S6. Funnel plot of ICU length of stay for included RCTs.**

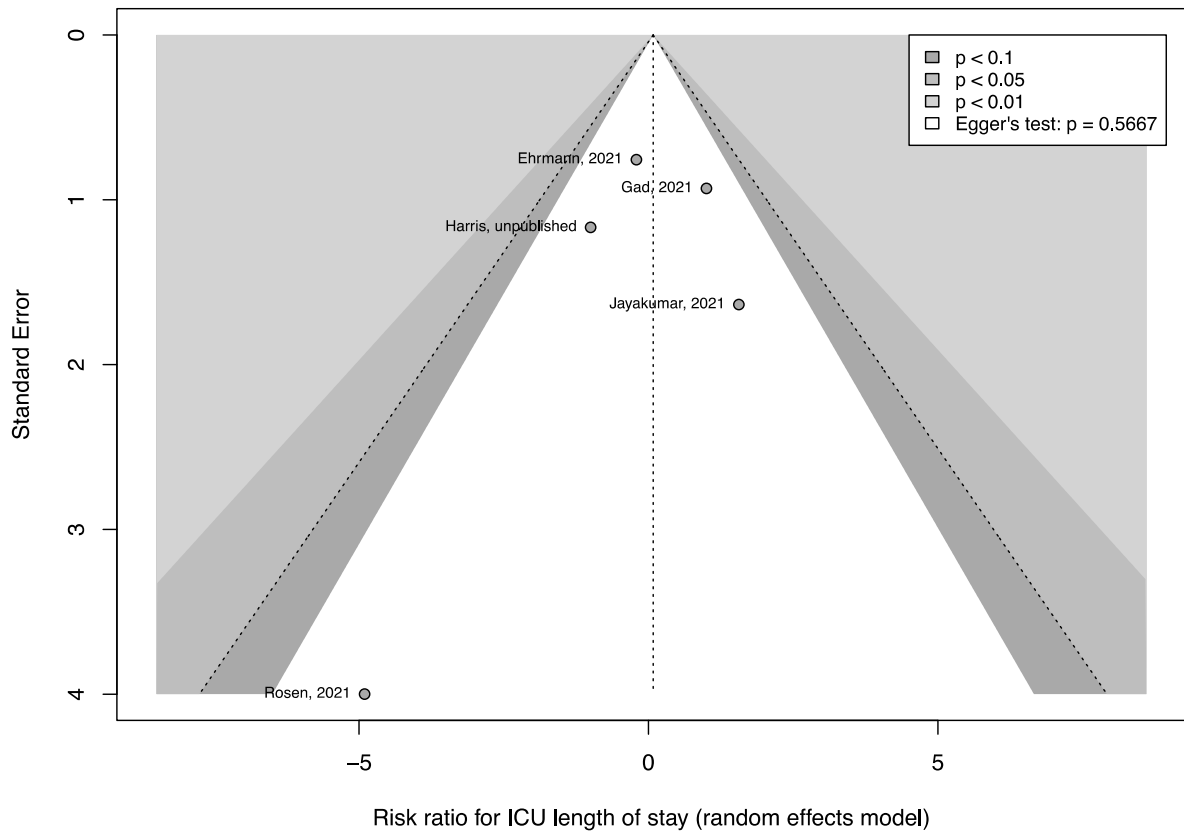

**Figure S7. Funnel plot of hospital length of stay for included RCTs.**

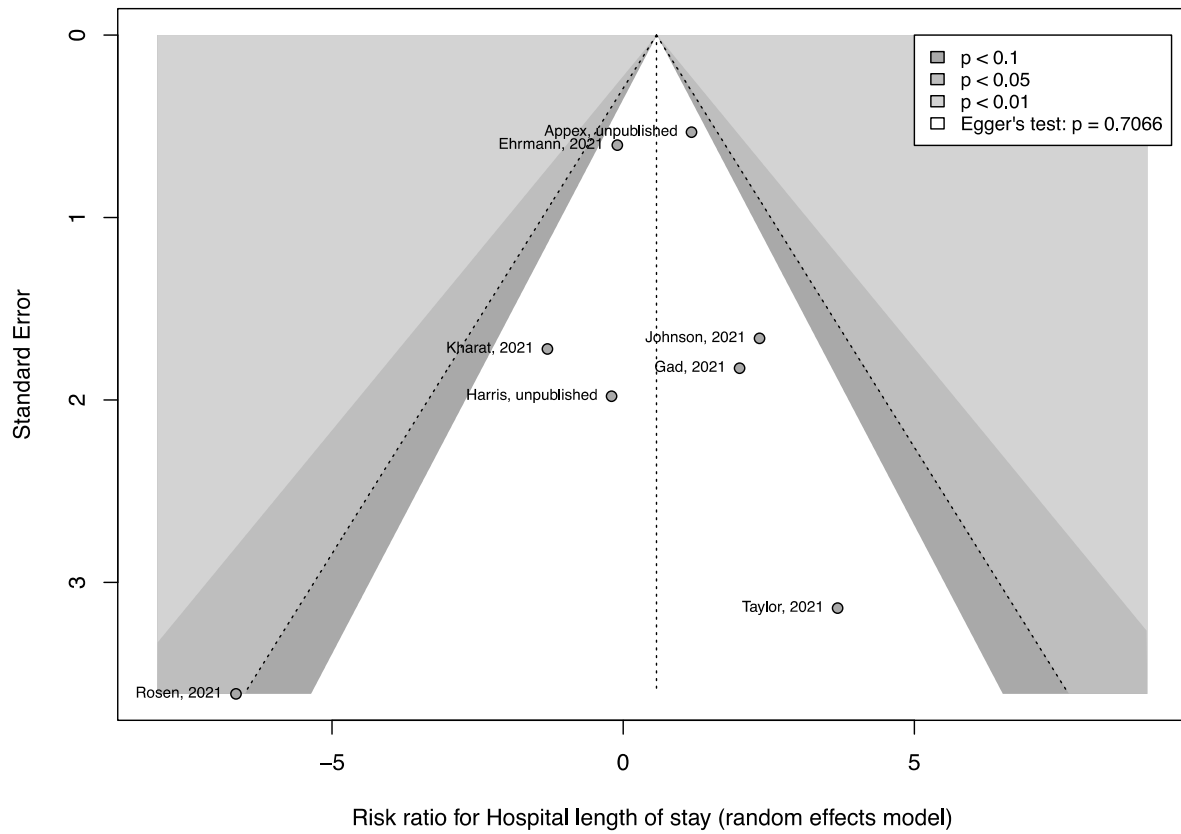

**Table S4. Assessment on risk of bias for included non-RCTs using Newcastle-Ottawa Scale.**

| Author, year         | Selection                                |                                     |                           | Comparability                                     |                                           |                           | Outcome               |                                             |                                  | Quality <sup>#</sup> |
|----------------------|------------------------------------------|-------------------------------------|---------------------------|---------------------------------------------------|-------------------------------------------|---------------------------|-----------------------|---------------------------------------------|----------------------------------|----------------------|
|                      | Representativeness of the exposed cohort | Selection of the non-exposed cohort | Ascertainment of exposure | Outcome of interest not present at start of study | Controls for age, sex, and marital status | Controls of other factors | Assessment of outcome | Follow-up long enough for outcomes to occur | Adequacy of follow-up of cohorts |                      |
| Alsharif, 2021       |                                          |                                     | *                         | *                                                 | MD                                        | MD                        | *                     | *                                           | *                                | MD                   |
| Altinay, 2021        |                                          |                                     | *                         | *                                                 |                                           | *                         | *                     | *                                           | *                                | Fair                 |
| Barker, 2021         |                                          |                                     | *                         | *                                                 | *                                         |                           | *                     | *                                           | *                                | Fair                 |
| Fazzini, 2021        |                                          |                                     | *                         | *                                                 | *                                         | *                         | *                     | *                                           | *                                | Fair                 |
| Ferrando, 2020       |                                          |                                     | *                         | *                                                 | *                                         |                           | *                     | *                                           | *                                | Fair                 |
| Jagan, 2020          |                                          |                                     | *                         | *                                                 |                                           | *                         | *                     | *                                           | *                                | Fair                 |
| Padrão, 2020         |                                          |                                     | *                         | *                                                 |                                           |                           | *                     | *                                           | *                                | Poor                 |
| Jouffroy, 2021       |                                          |                                     | *                         | *                                                 | *                                         |                           | *                     | *                                           | *                                | Fair                 |
| Loureiro-Amigo, 2021 |                                          |                                     | *                         | *                                                 | *                                         |                           | *                     | *                                           | *                                | Fair                 |
| Meredith, 2020       |                                          |                                     | *                         | *                                                 | MD                                        | MD                        | *                     | *                                           | *                                | MD                   |
| Ni, 2021             |                                          |                                     | *                         | *                                                 | *                                         | *                         | *                     | *                                           | *                                | Fair                 |
| Pierucci, 2021       |                                          |                                     | *                         | *                                                 |                                           |                           | *                     | *                                           | *                                | Poor                 |
| Perez-Nieto, 2021    |                                          |                                     | *                         | *                                                 |                                           |                           | *                     | *                                           | *                                | Poor                 |
| Sryma, 2021          |                                          |                                     | *                         | *                                                 |                                           | *                         | *                     | *                                           | *                                | Fair                 |
| Vianello, 2021       |                                          |                                     | *                         | *                                                 | *                                         |                           | *                     | *                                           | *                                | Fair                 |
| Prud'homme, 2021     |                                          |                                     | *                         | *                                                 | *                                         | *                         | *                     | *                                           | *                                | Fair                 |
| Simioli, 2021        |                                          |                                     | *                         | *                                                 | *                                         | *                         | *                     | *                                           | *                                | Fair                 |
| Tonelli, 2021        |                                          |                                     | *                         | *                                                 |                                           |                           | *                     | *                                           | *                                | Poor                 |
| Zang, 2020           |                                          |                                     | *                         | *                                                 | *                                         |                           | *                     | *                                           | *                                | Fair                 |

MD, missing data. <sup>#</sup>The quality (good, fair, and poor) was defined based on the following criteria: Good - 3 or 4 stars in 'Selection' domain AND 1 or 2 stars in 'Comparability' domain AND 2 or 3 stars in 'Outcome' domain; Fair - 2 stars in 'Selection' domain AND 1 or 2 stars in 'Comparability' domain AND 2 or 3 stars in 'Outcome' domain; Poor - 0 or 1 star in 'Selection' domain OR 0 star in 'Comparability' domain OR 0 or 1 star in 'Outcome' domain. RCT, randomised controlled trial.

**Figure S8. Funnel plot of intubation for included non-RCTs.**

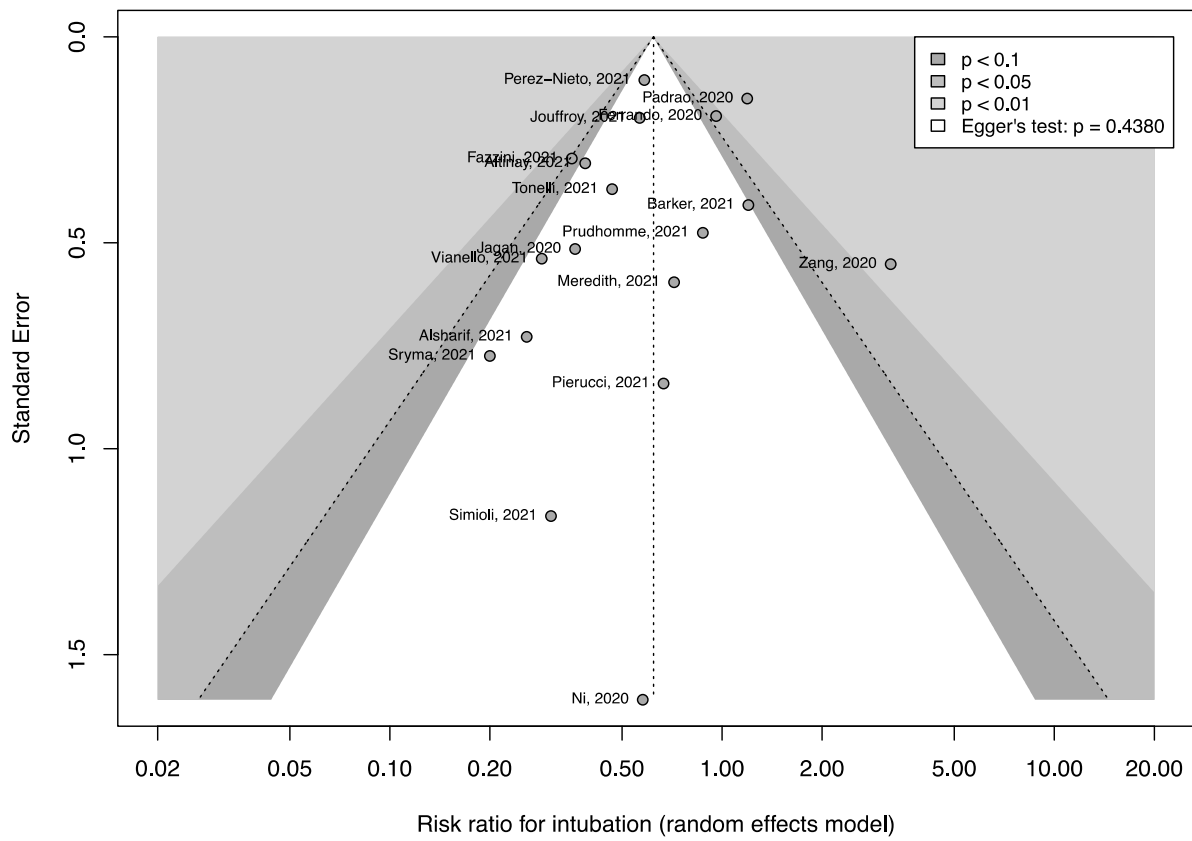

**Figure S9. Funnel plot of mortality for included non-RCTs.**

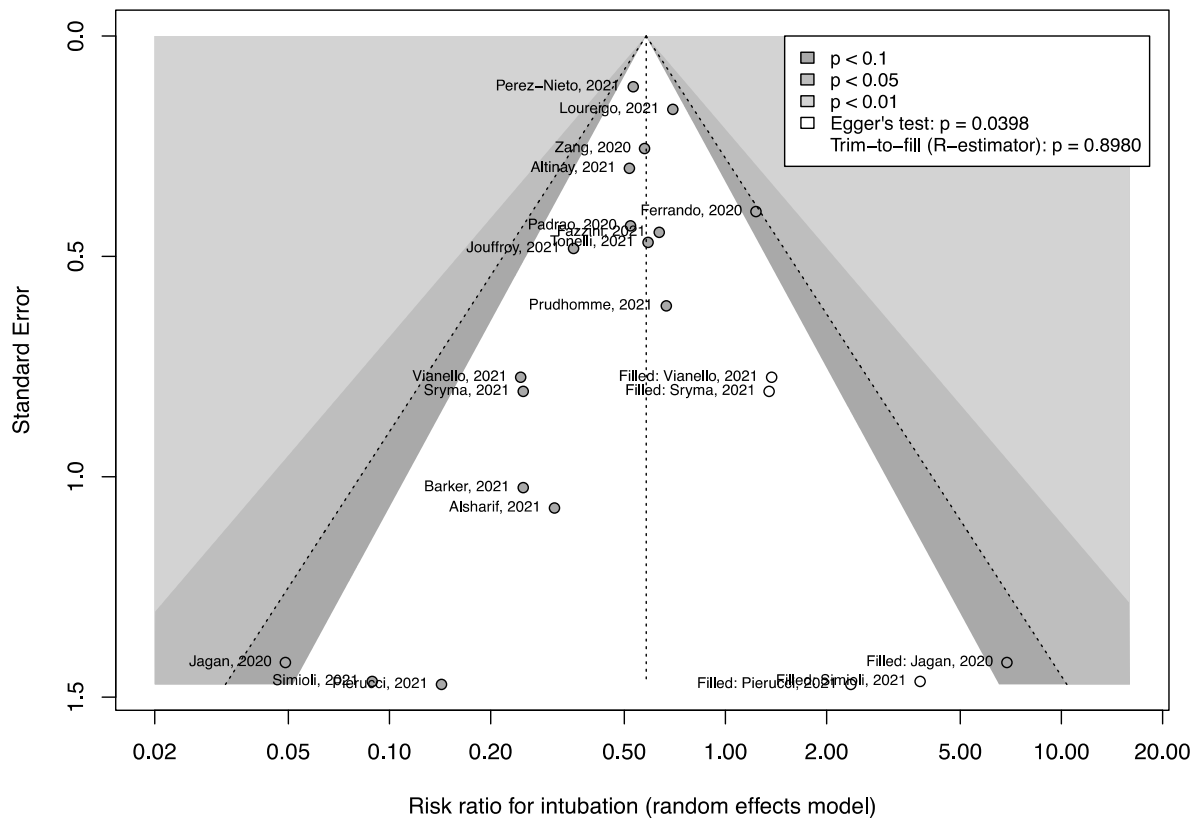

**Table S5. Grading of recommendations, assessment, development and evaluations (GRADE).**

| Outcome                                    | No of studies | Study design | No of participants |         | Certainty assessment     |                       |                       |              |                   | No of patients  |                 | Effect (Random effects model) |                               | Certainty     |
|--------------------------------------------|---------------|--------------|--------------------|---------|--------------------------|-----------------------|-----------------------|--------------|-------------------|-----------------|-----------------|-------------------------------|-------------------------------|---------------|
|                                            |               |              | APP                | Control | Risk of bias             | Imprecision           | Inconsistency         | Indirectness | Publication bias  | APP             | Control         | Relative risk (95% CI)        | Absolute effect (95% CI)      |               |
| Risk of intubation                         | 10            | RCT          | 1013               | 972     | Not serious <sup>a</sup> | Low <sup>b</sup>      | Low <sup>h</sup>      | Low          | Low <sup>j</sup>  | 216/976 (22.1%) | 255/942 (27.1%) | 0.84 (0.72-0.97)              | -                             | ⊕⊕⊕⊕ High     |
| Subgroup: Advanced respiratory support     | 3             | RCT          | 605                | 604     | Not serious <sup>a</sup> | Low <sup>c</sup>      | Low <sup>h</sup>      | Low          |                   | 198/605 (32.7%) | 237/604 (39.2%) | 0.83 (0.71-0.97)              | -                             | ⊕⊕⊕⊕ High     |
| Subgroup: Conventional oxygen therapy      | 8             | RCT          | 405                | 368     | Not serious <sup>a</sup> | High <sup>d</sup>     | Low <sup>h</sup>      | Low          |                   | 16/368 (4.3%)   | 18/338 (5.3%)   | 0.87 (0.45-1.69)              | -                             | ⊕⊕⊕○ Moderate |
| Subgroup: ICU                              | 3             | RCT          | 583                | 578     | Not serious <sup>a</sup> | Low <sup>c</sup>      | Low <sup>h</sup>      | Low          |                   | 189/583 (32.4%) | 226/578 (39.1%) | 0.83 (0.71-0.97)              | -                             | ⊕⊕⊕⊕ High     |
| Subgroup: Non ICU                          | 7             | RCT          | 394                | 355     | Not serious <sup>a</sup> | High <sup>d</sup>     | Low <sup>h</sup>      | Low          |                   | 15/357 (4.2%)   | 16/325 (4.9%)   | 0.88 (0.44-1.76)              | -                             | ⊕⊕⊕○ Moderate |
| Mortality                                  | 10            | RCT          | 1013               | 972     | Not serious <sup>a</sup> | High <sup>d</sup>     | Low <sup>h</sup>      | Low          | High <sup>k</sup> | 135/976 (13.8%) | 143/942 (15.2%) | 1.0 (0.70-1.44)               | -                             | ⊕⊕○○ Low      |
| Subgroup: Advanced respiratory support     | 3             | RCT          | 605                | 604     | Not serious <sup>a</sup> | High <sup>d</sup>     | Moderate <sup>i</sup> | Low          |                   | 124/605 (20.5%) | 135/604 (22.4%) | 1.23 (0.54-2.80)              | -                             | ⊕⊕○○ Low      |
| Subgroup: Conventional oxygen therapy      | 8             | RCT          | 405                | 368     | Not serious <sup>a</sup> | High <sup>d</sup>     | Low <sup>h</sup>      | Low          |                   | 10/342 (2.9%)   | 8/316 (2.5%)    | 1.14 (0.47-2.75)              | -                             | ⊕⊕○○ Low      |
| Subgroup: ICU                              | 3             | RCT          | 583                | 578     | Not serious <sup>a</sup> | High <sup>e</sup>     | Low <sup>h</sup>      | Low          |                   | 116/583 (19.9%) | 127/578 (22.0%) | 0.90 (0.72-1.13)              | -                             | ⊕⊕○○ Low      |
| Subgroup: Non ICU                          | 7             | RCT          | 394                | 355     | Not serious <sup>a</sup> | Low <sup>f</sup>      | Low <sup>h</sup>      | Low          |                   | 13/357 (3.6%)   | 13/325 (4.0%)   | 0.81 (0.41-1.59)              | -                             | ⊕⊕⊕○ Moderate |
| Need for escalation of respiratory support | 7             | RCT          | 935                | 905     | Not serious <sup>a</sup> | High <sup>d</sup>     | Moderate <sup>i</sup> | Low          | Low <sup>j</sup>  | 278/935 (29.7%) | 308/905 (34.0%) | 1.03 (0.77-1.37)              | -                             | ⊕⊕○○ Low      |
| Need for ICU admission                     | 6             | RCT          | 268                | 233     | Not serious <sup>a</sup> | Moderate <sup>g</sup> | Low <sup>h</sup>      | Low          | Low <sup>k</sup>  | 38/258 (14.7%)  | 39/216 (18.1%)  | 0.75 (0.51-1.10)              | -                             | ⊕⊕⊕⊕ High     |
| ICU length of stay                         | 5             | RCT          | 472                | 508     | Not serious <sup>a</sup> | High <sup>e</sup>     | Low <sup>h</sup>      | Low          | Low <sup>j</sup>  | 472             | 508             | -                             | 0.08 days longer (-0.89-1.05) | ⊕⊕○○ Low      |
| Hospital length of stay                    | 8             | RCT          | 857                | 820     | Not serious <sup>a</sup> | High <sup>e</sup>     | Moderate <sup>i</sup> | Low          | Low <sup>j</sup>  | 857             | 820             | -                             | 0.57 days longer (-0.35-1.49) | ⊕⊕○○ Low      |

a. According to Figure S1 Assessment of risk of bias for RCTs, 1 study did not mention random sequence generation, 4 studies did not mention allocation concealment, and all studies lacked blinding due to the nature of prone positioning in awake patients and did not mention the blinding of outcome assessment.

b. Although the 95% CI of relative risk was close to a relative risk of 1.0 (no effect), the largest plausible effect suggested that APP might reduce the relative risk of intubation by as much as 28% especially when considering the overall risk of intubation of 40% or more in hypoxemic patients with COVID-19. In addition, trial sequential analysis supported the true positive conclusion by reaching the optimal information size.

c. Although the 95% CI of relative risk was close to a relative risk of 1.0 (no effect), the largest plausible effect suggested that APP might reduce the relative risk of intubation by as much as 29% especially when considering the overall risk of intubation of 40% or more in hypoxemic patients with COVID-19. In addition, trial sequential analysis did not indicated futility although the optimal information size was not reached but very close already.

d. The 95% CI of relative risk was wide and overlapped a relative risk of 1.0 (no effect). Trial sequential analysis indicated that the optimal information size was not reached.

e. The 95% CI of relative risk overlapped a relative risk of 1.0 (no effect). Trial sequential analysis indicated that the optimal information size was not reached.

f. Although the 95% CI of relative risk overlapped a relative risk of 1.0 (no effect), trial sequential analysis indicated that the optimal information size was reached.

g. The 95% CI of relative risk overlapped a relative risk of 1.0 (no effect). Although the optimal information size was not reached, but trial sequential analysis indicated futility in the pooled effect estimate.

h. Confidence intervals of each study overlapped and no statistical heterogeneity was found.

i.  $I^2 = 32\%$  although heterogeneity test showed  $p\text{-value} > 0.05$ .

j. According to Figure S4 Funnel plot for RCTs, Egger's test showed symmetry.

k. According to Figure S5 Funnel plot for RCTs, Egger's test showed symmetry.

APP, awake prone positioning; CI, confidence interval; ICU, intensive care unit; RCT, randomized controlled trial.

**Figure S10. Trial sequential analysis of intubation for included RCTs.**

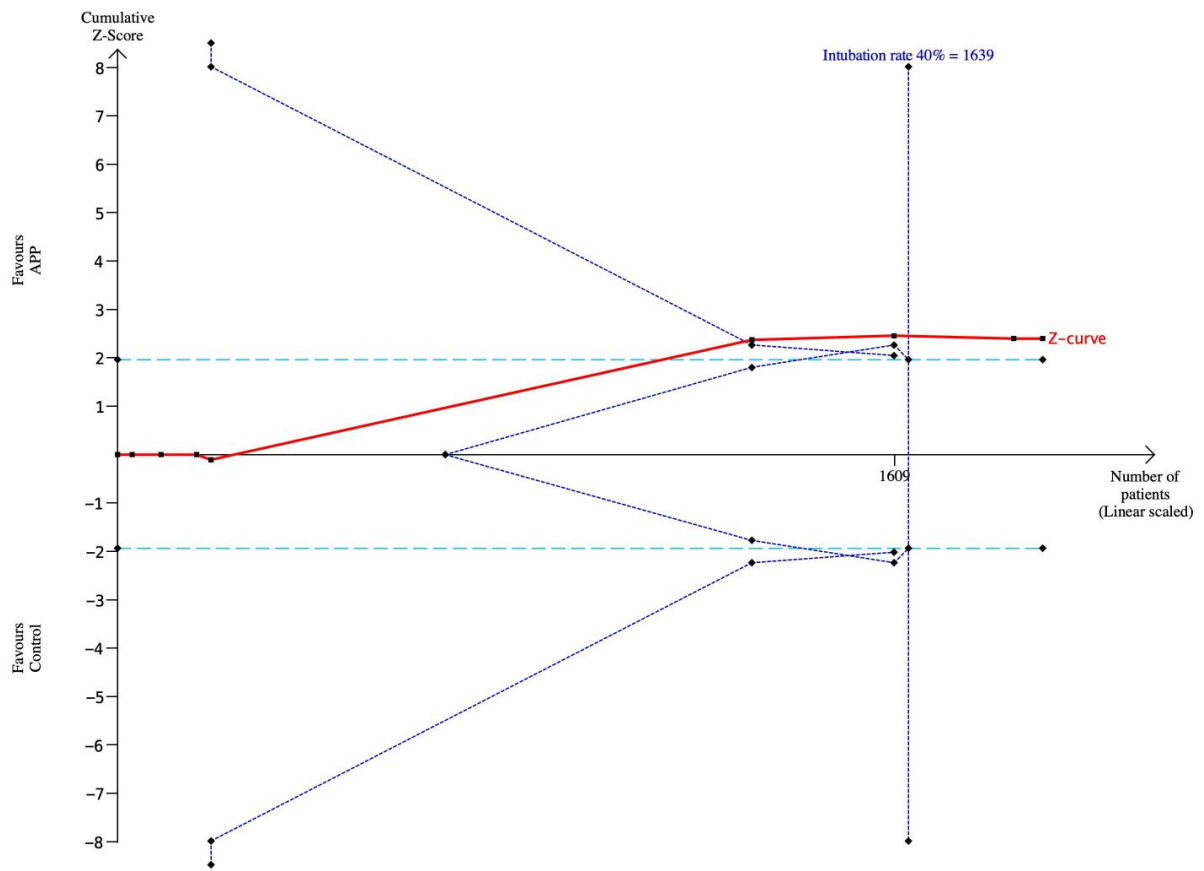



**Figure S11. Trial sequential analysis of intubation in subgroups of advanced respiratory support and conventional oxygen therapy for included RCTs.**

**A. Advanced respiratory support**

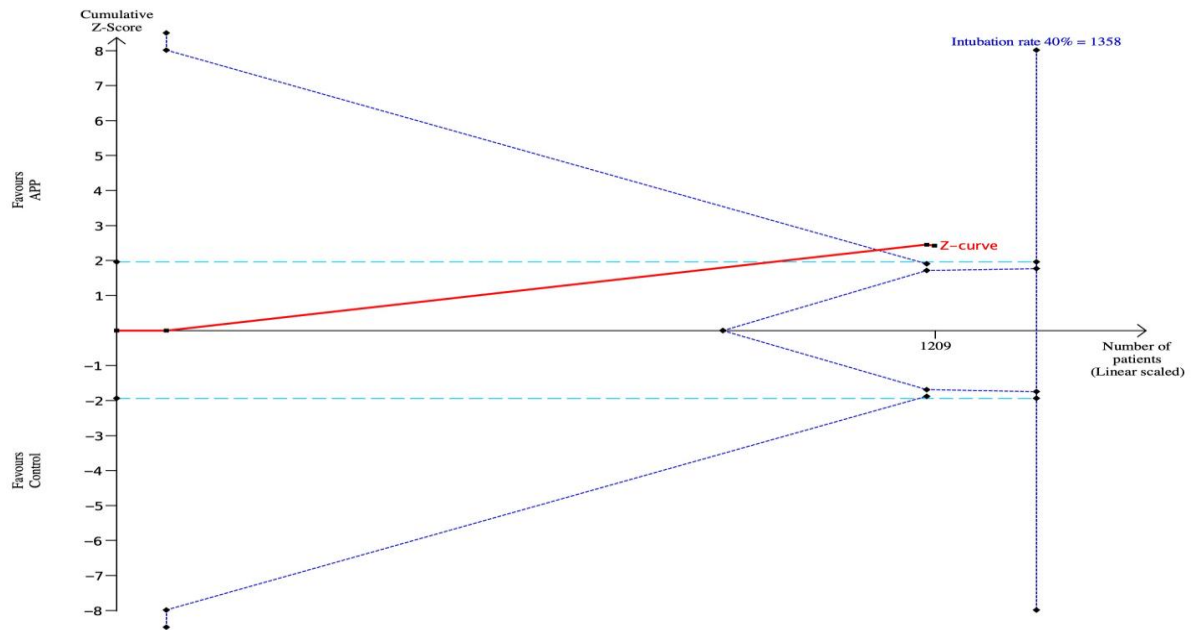

**B. Conventional oxygen therapy**

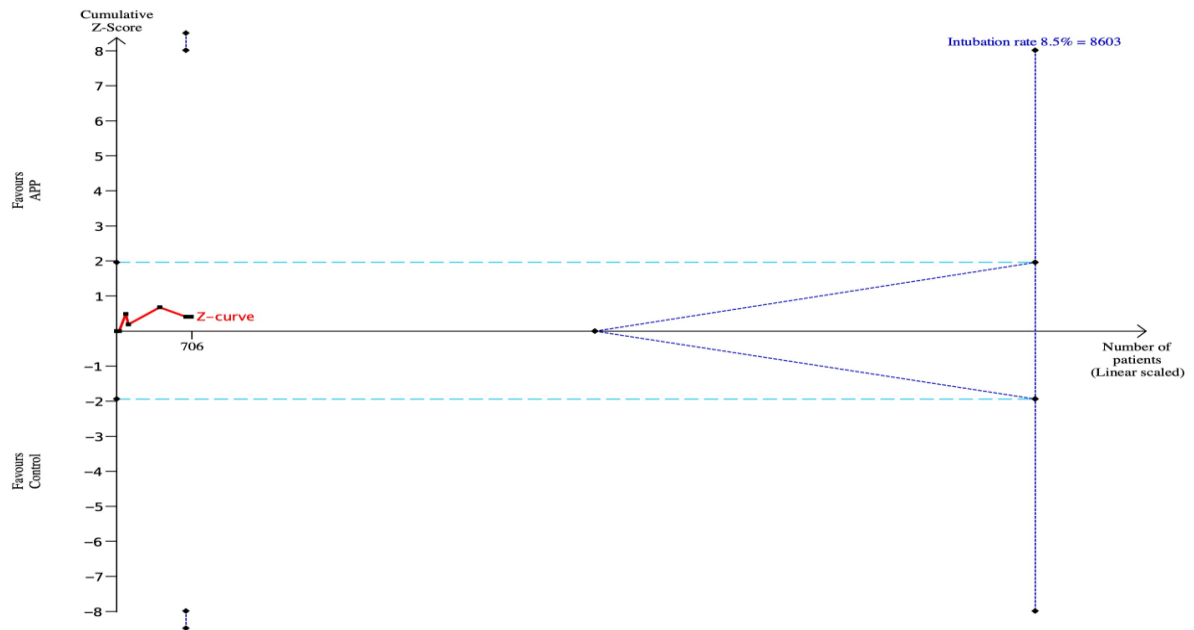

**Figure S12. Trial sequential analysis of intubation in subgroups of ICU and non-ICU for included RCTs.**

**A. ICU**

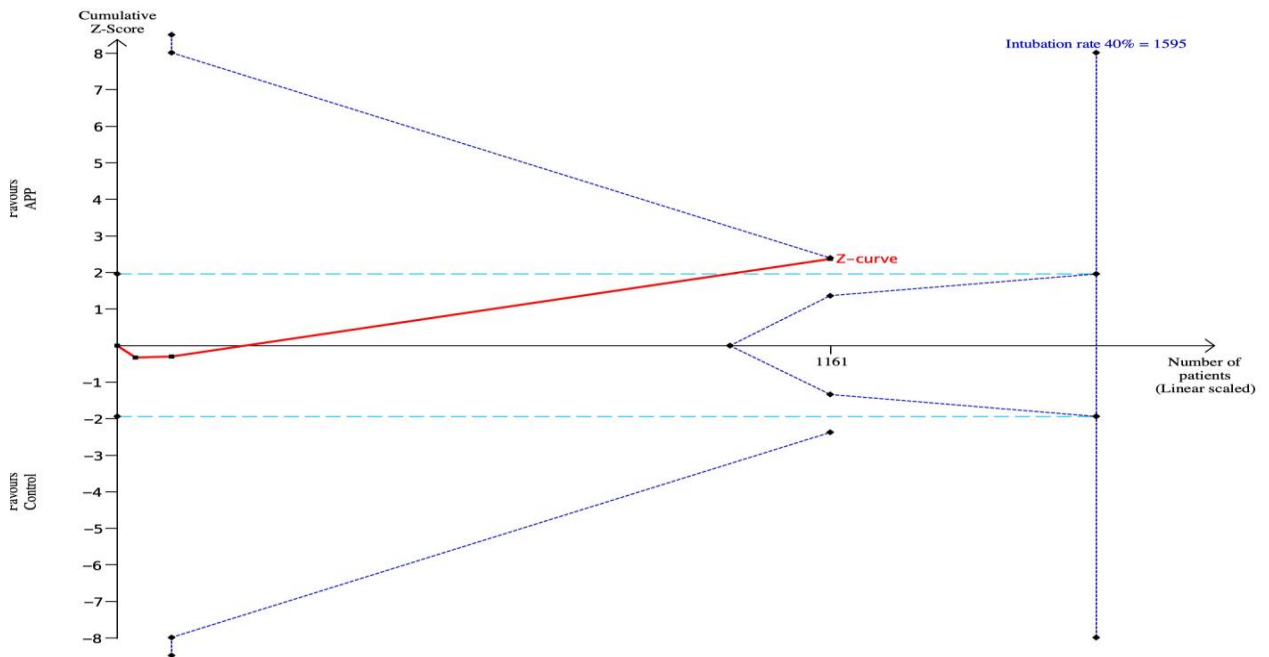

**B. Non ICU**

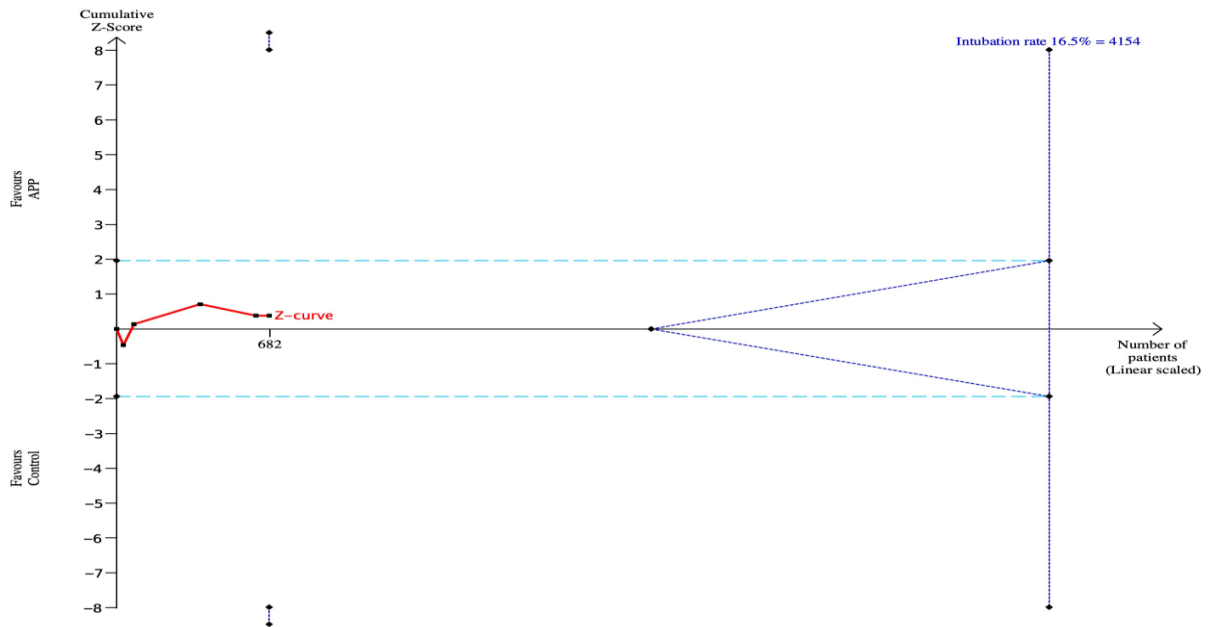

Figure S13. Intubation and mortality for Non-RCTs.

### A Intubation

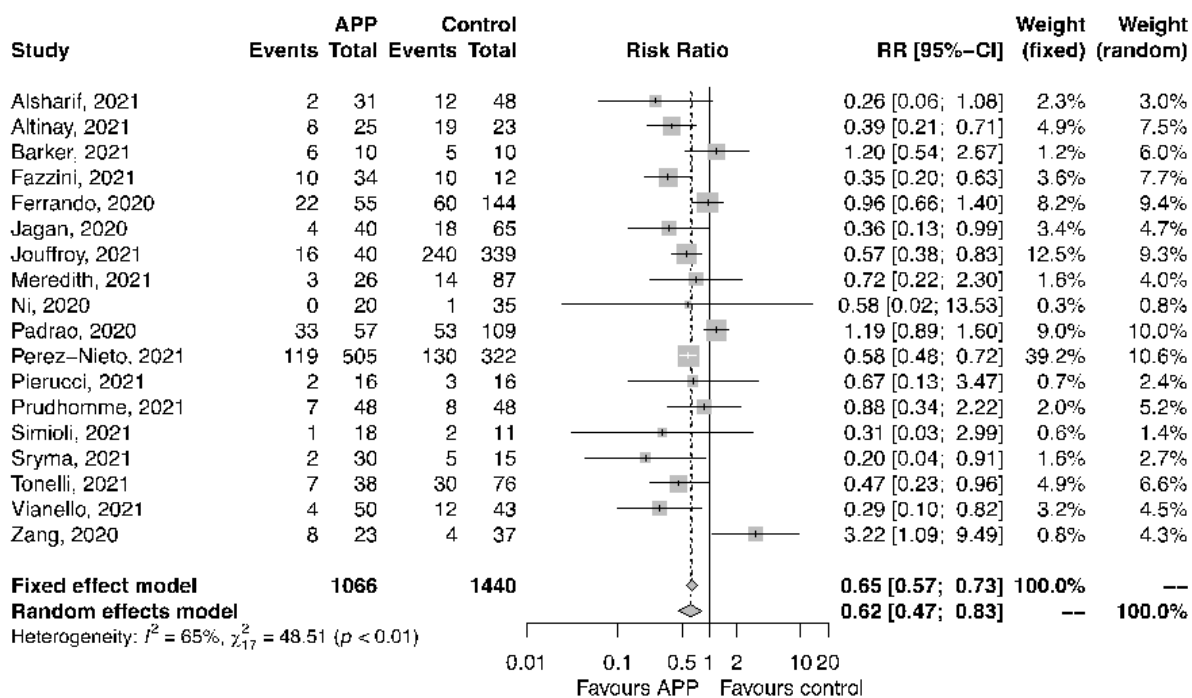

### B Mortality

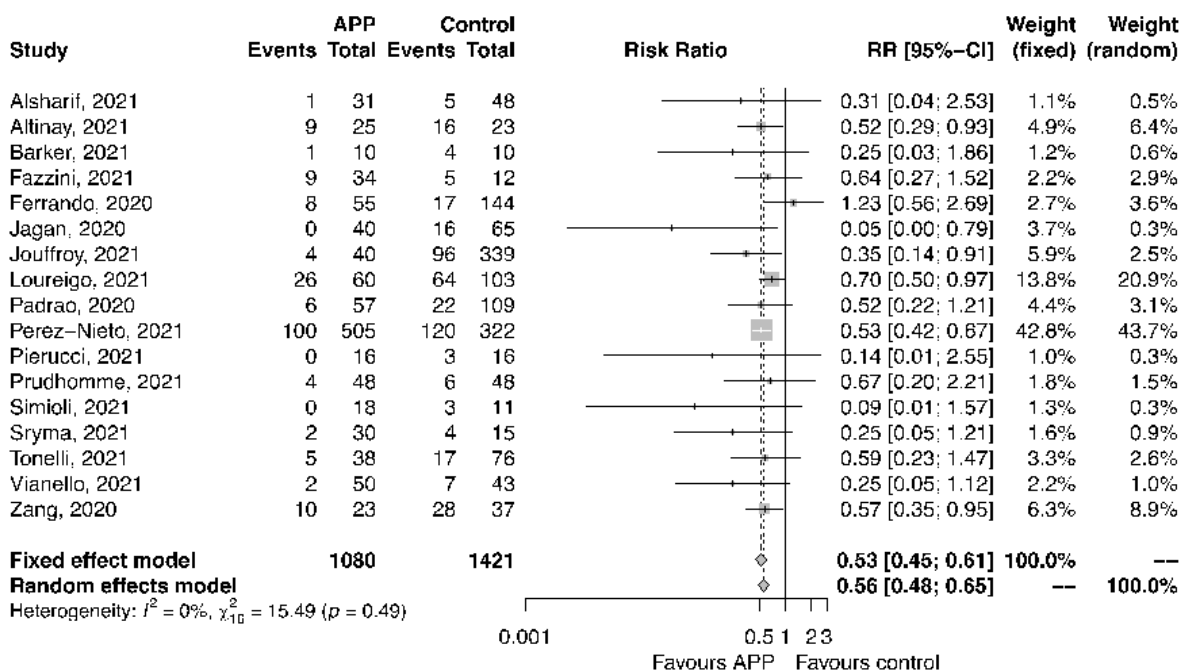

**Figure S14. Subgroup analysis of mortality for included RCTs**

**A. Mortality (Advanced vs. Conventional respiratory support)**

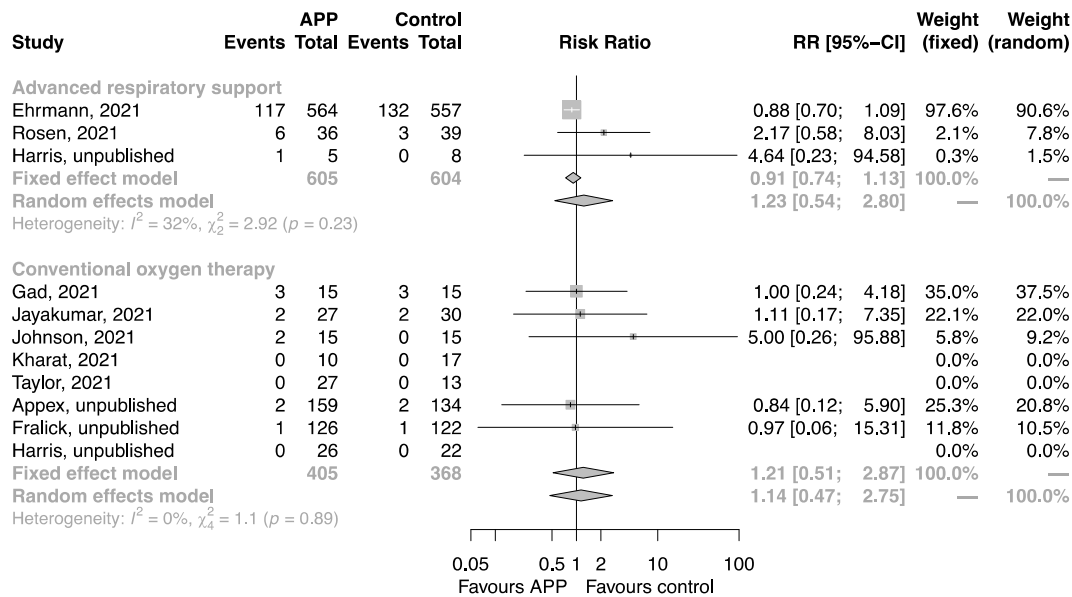

Test for subgroup differences (fixed effect):  $\chi^2_1 = 0.40$ ,  $df = 1$  ( $p = 0.53$ )  
 Test for subgroup differences (random effects):  $\chi^2_1 = 0.02$ ,  $df = 1$  ( $p = 0.90$ )

**B. Mortality (ICU vs. Non ICU)**

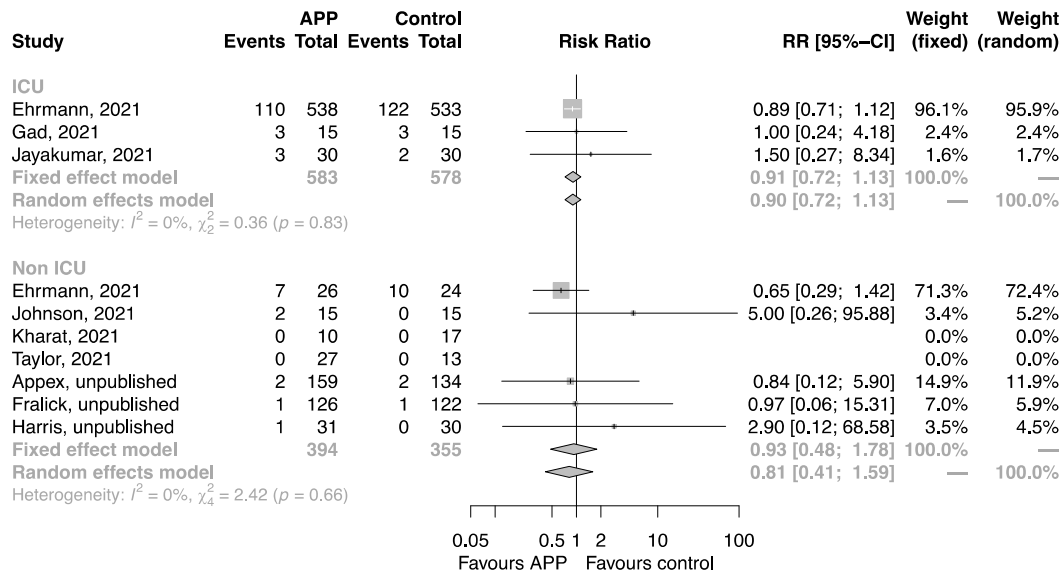

Test for subgroup differences (fixed effect):  $\chi^2_1 = 0.00$ ,  $df = 1$  ( $p = 0.95$ )  
 Test for subgroup differences (random effects):  $\chi^2_1 = 0.08$ ,  $df = 1$  ( $p = 0.77$ )

**Figure S15. Trial sequential analysis of mortality for included RCTs.**

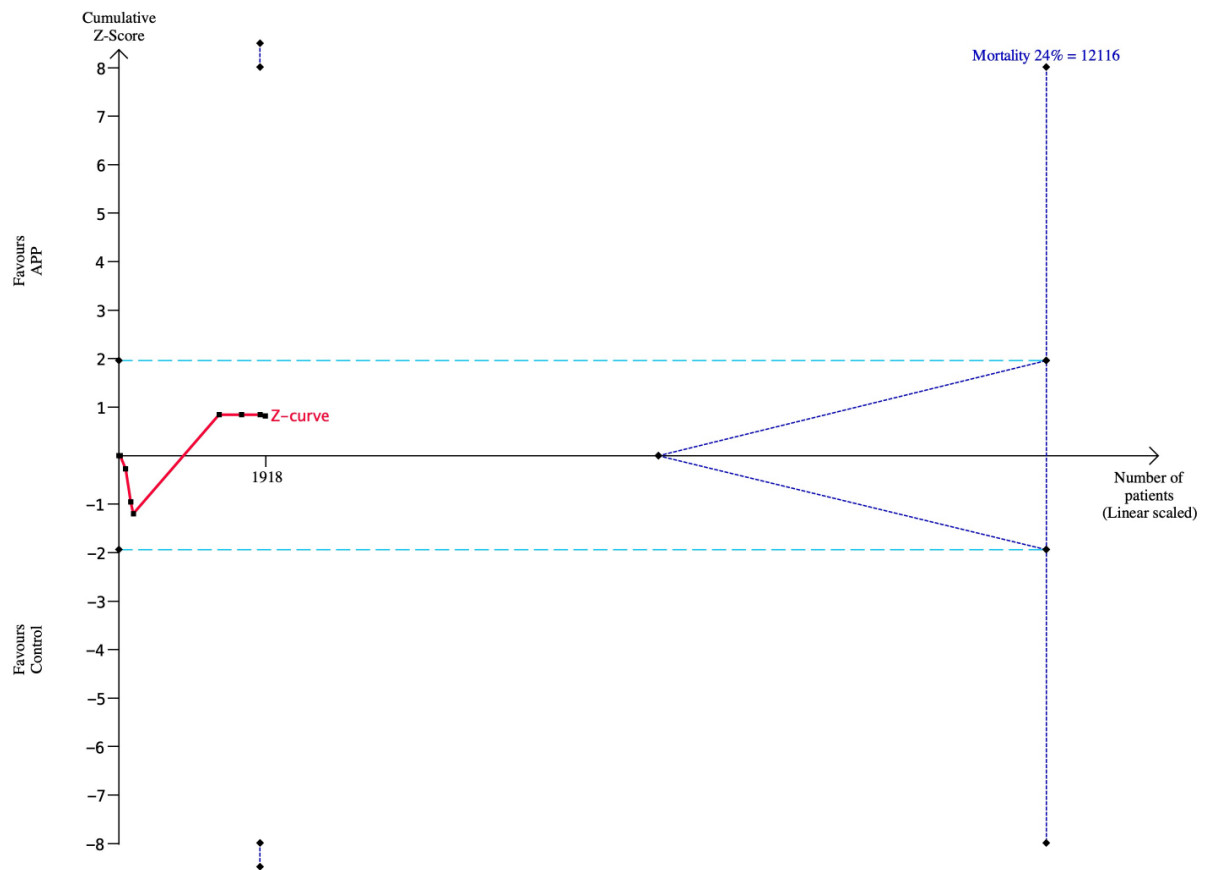

**Figure S16. Trial sequential analysis of mortality in subgroups of advanced respiratory support and conventional oxygen therapy for included RCTs.**

**A. Advanced respiratory support**

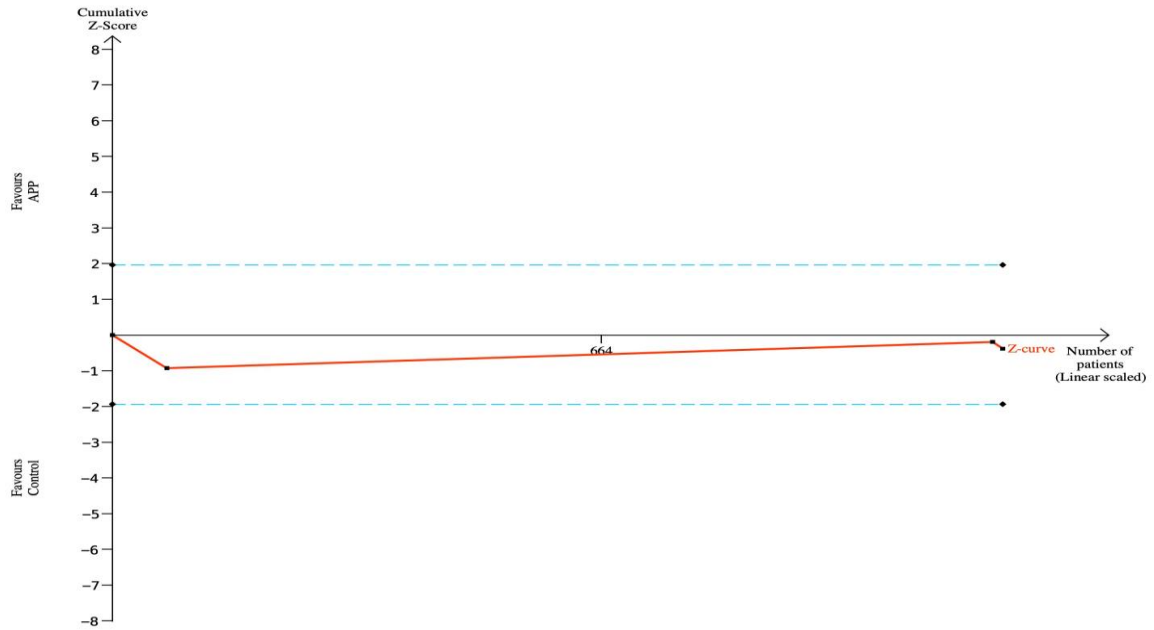

**B. Conventional oxygen therapy**

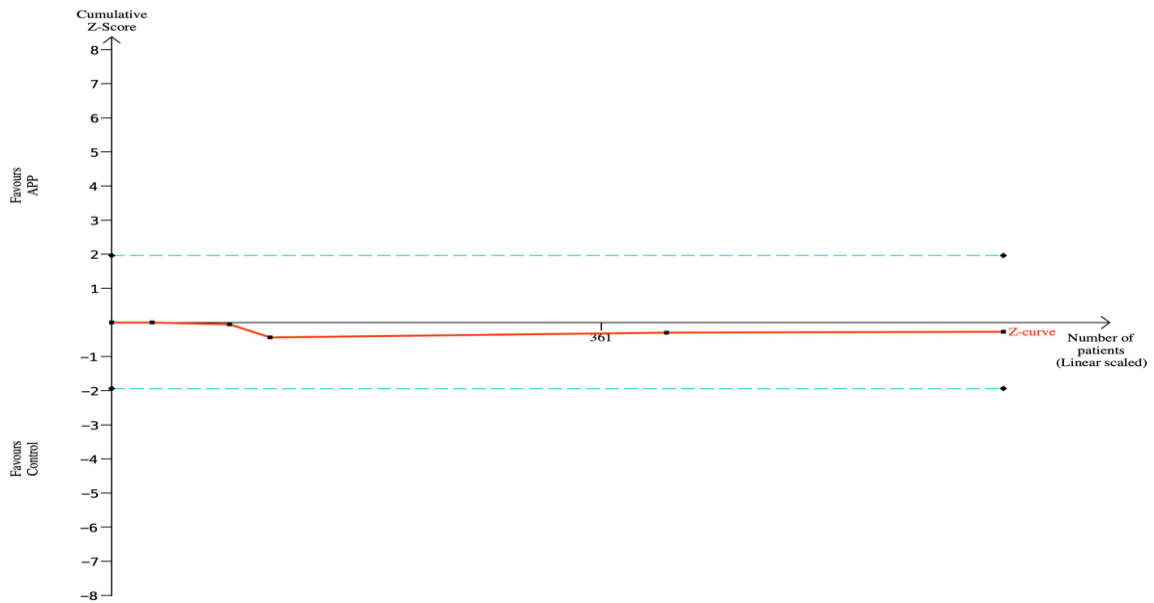

**Figure S17. Trial sequential analysis of mortality in subgroups of ICU and non-ICU for included RCTs.**

**A. ICU**

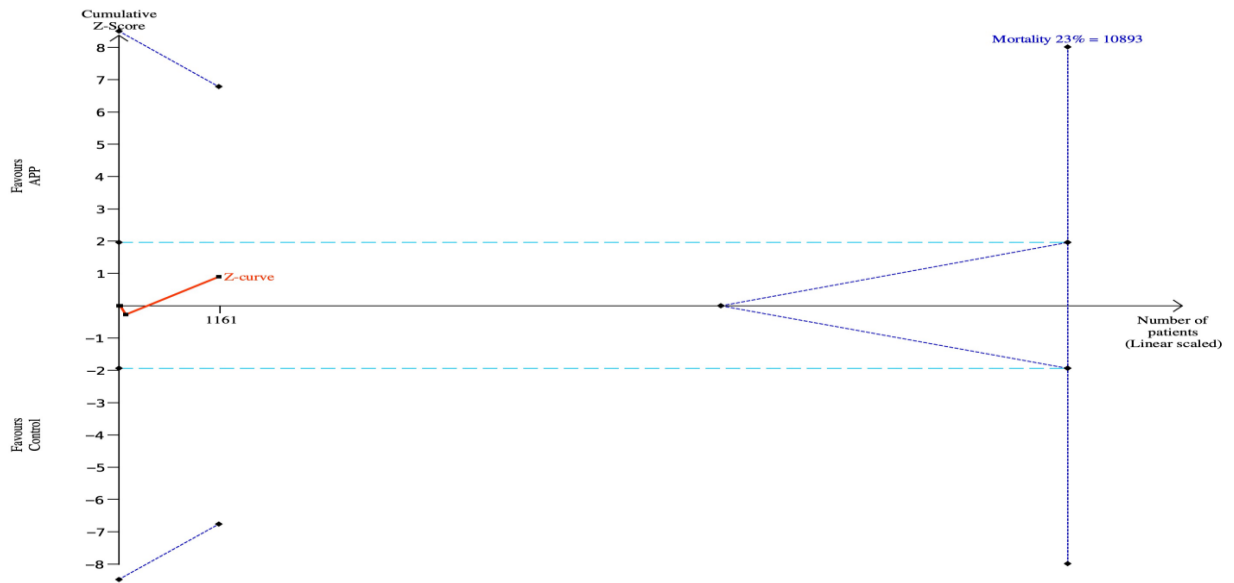

**B. Non ICU**

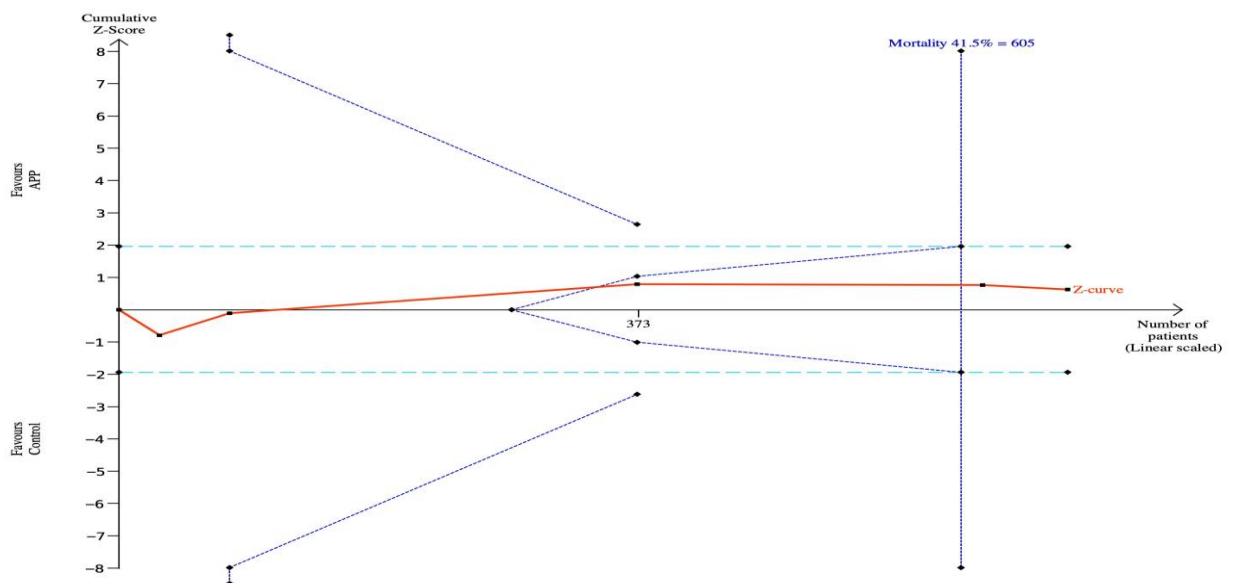

**Figure S18. Meta-analysis of mortality for RCTs after exclusion of studies with small-study effects by trim-and-fill.**

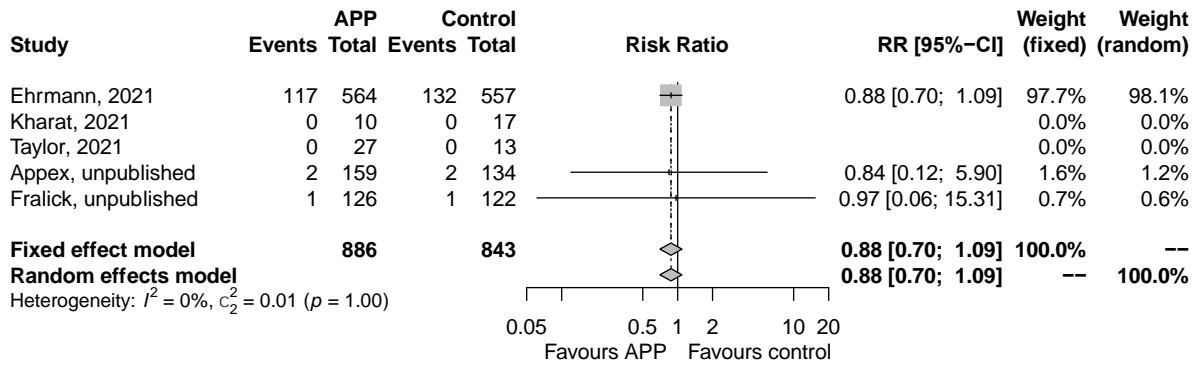



**Figure S19. Meta-analysis of mortality for non-RCTs after exclusion of studies with small-study effects by trim-and-fill.**

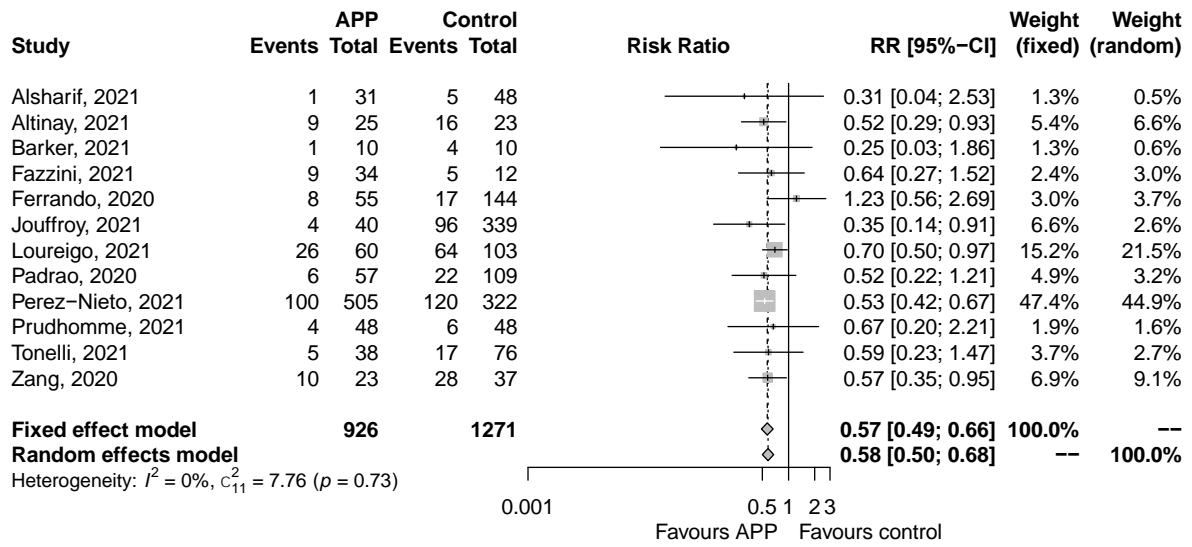

Figure S20. Secondary outcomes for included RCTs

**A Need for escalation of respiratory support**

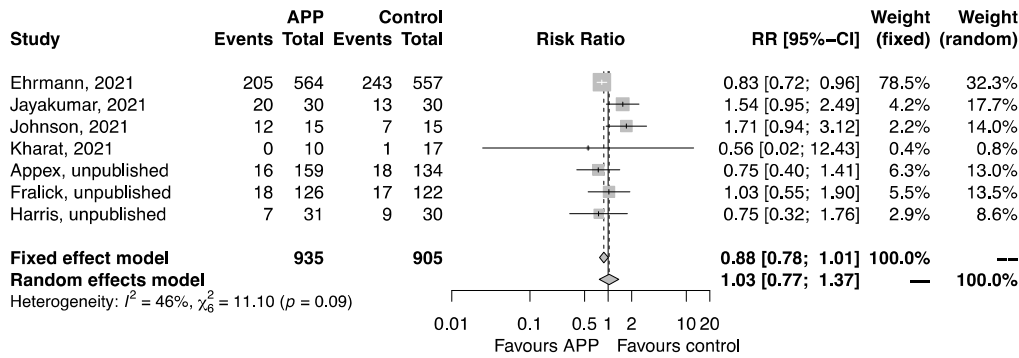

**B Need for ICU admission**

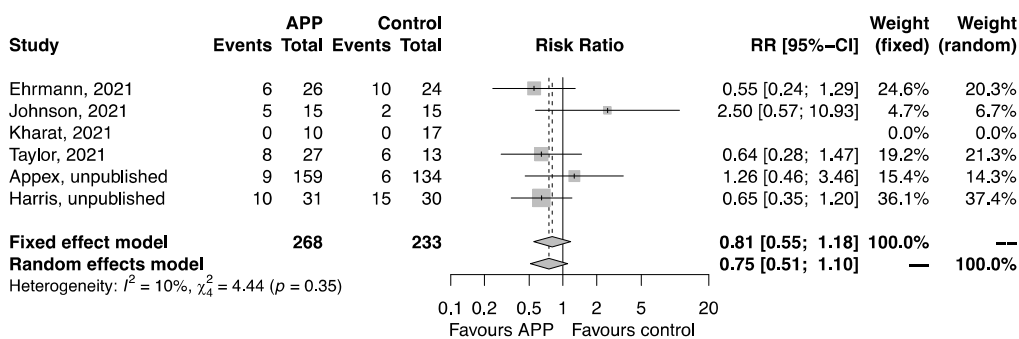

**C ICU length of stay**

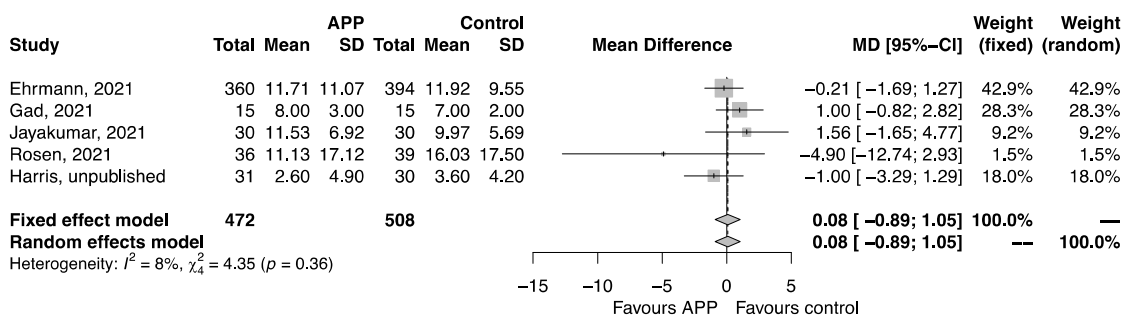

**D Hospital length of stay**

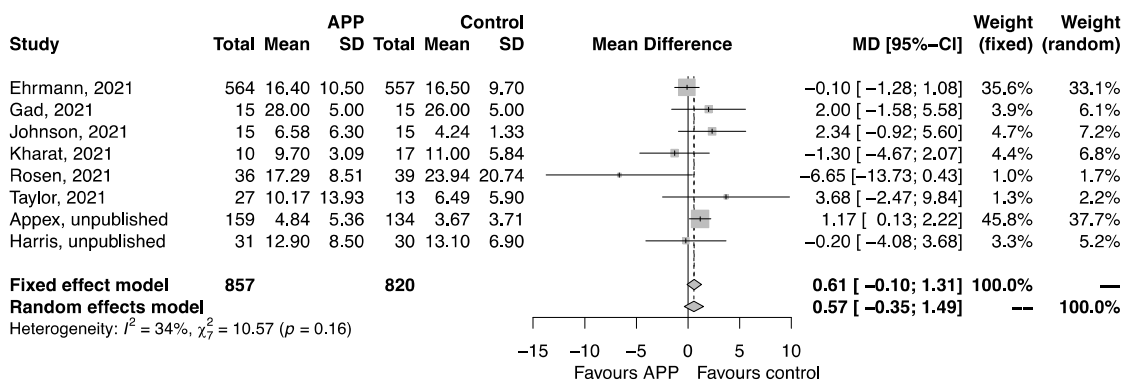

**Figure S21. Subgroup analysis of need for escalation of respiratory support for included RCTs**

**A. Need for escalation of respiratory support (Advanced vs. Conventional respiratory support)**

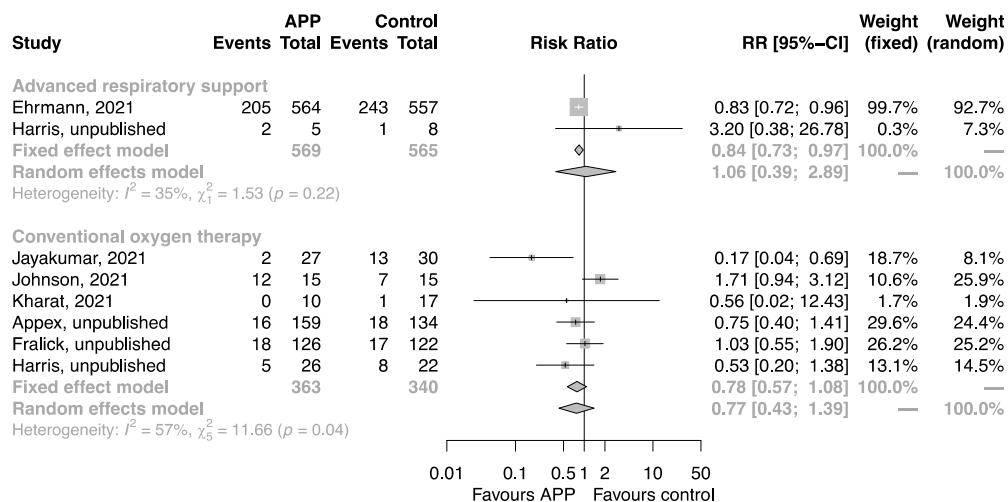

**B. Need for escalation of respiratory support (ICU vs. Non ICU)**

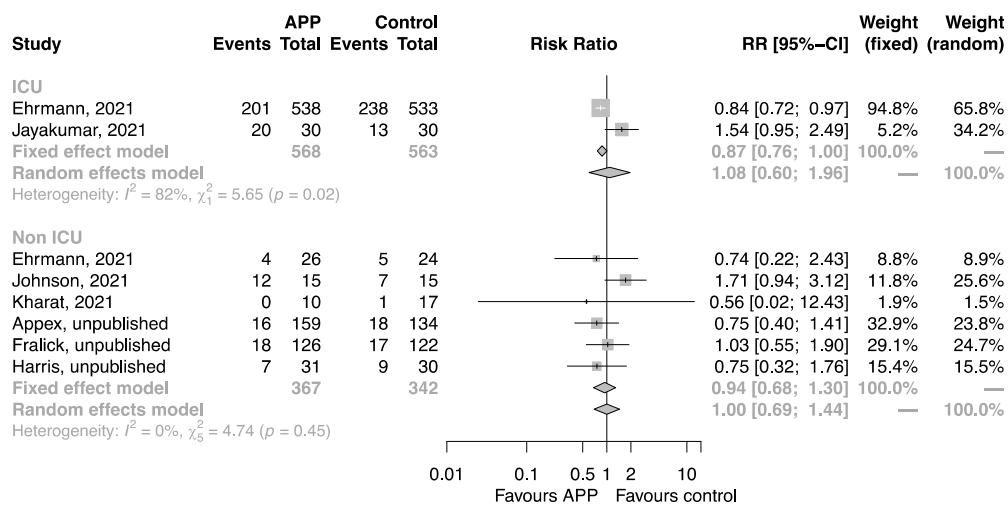

**Figure S22. Subgroup analysis of need for ICU admission for included RCTs**

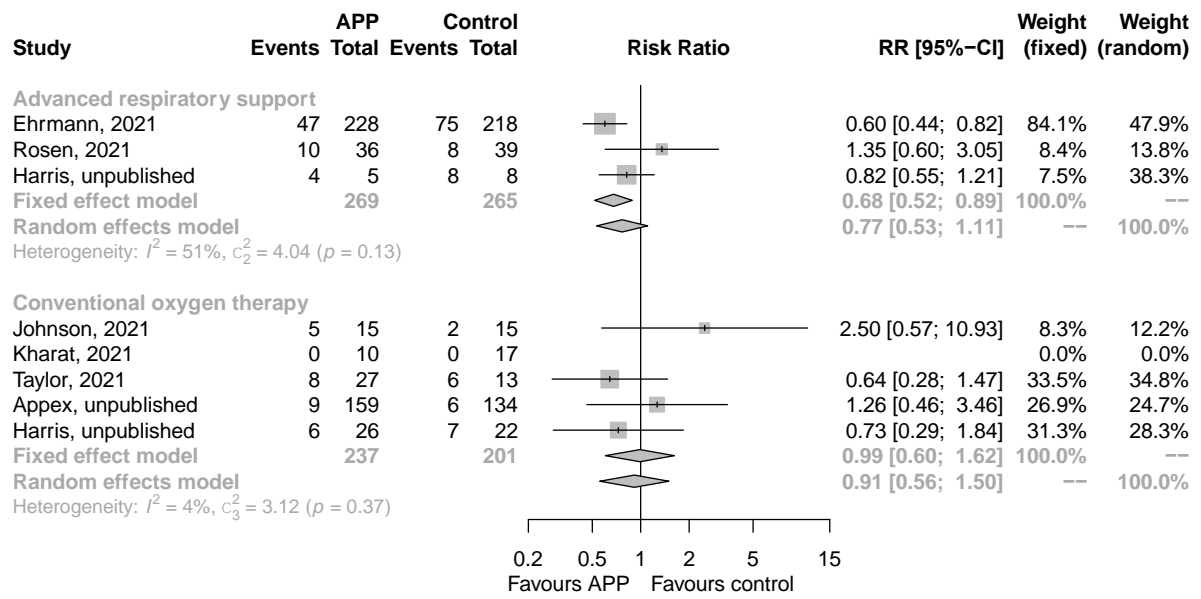

**Figure S23. Meta-analysis of need for ICU admission for RCTs after exclusion of studies with small-study effects by trim-and-fill.**

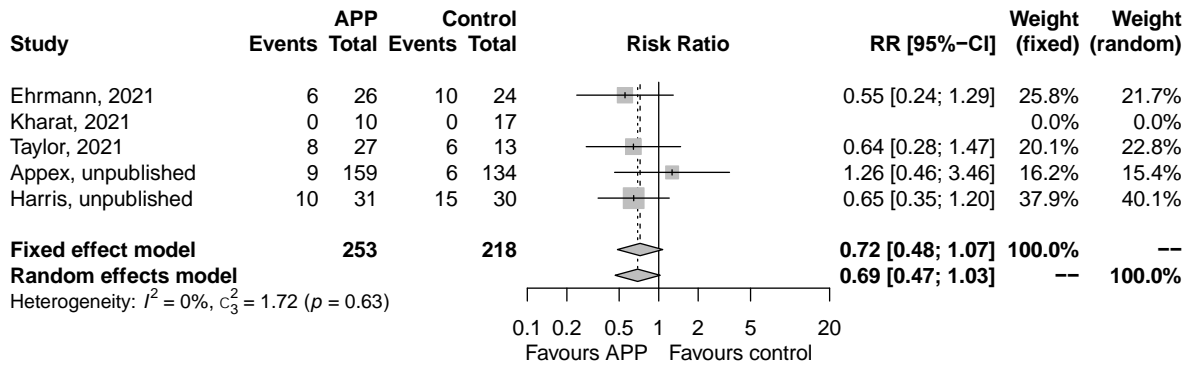

**Figure S24. Subgroup analysis of ICU length of stay for included RCTs**

**A. ICU length of stay (Advanced vs. Conventional respiratory support)**

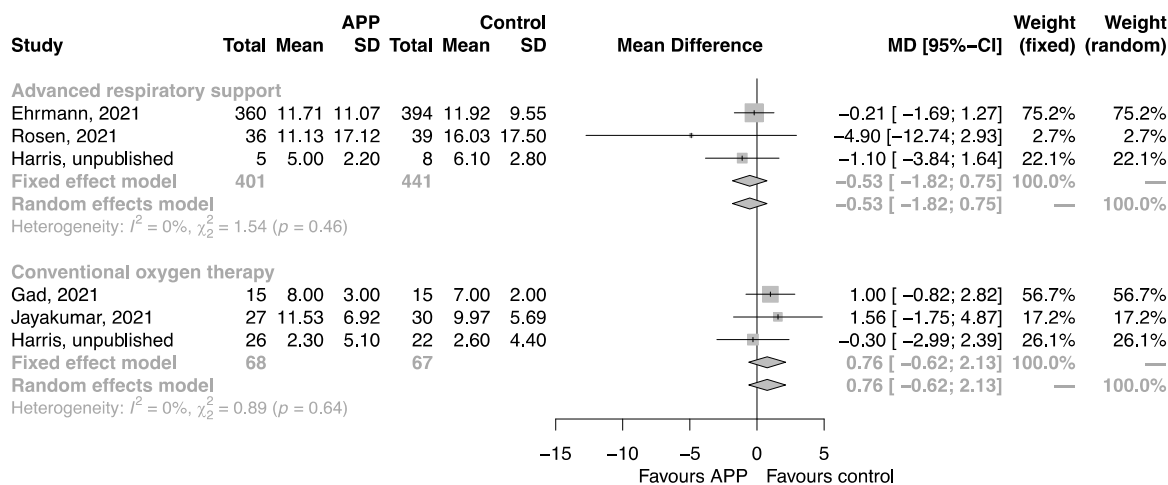

**B. ICU length of stay (ICU vs. Non ICU)**

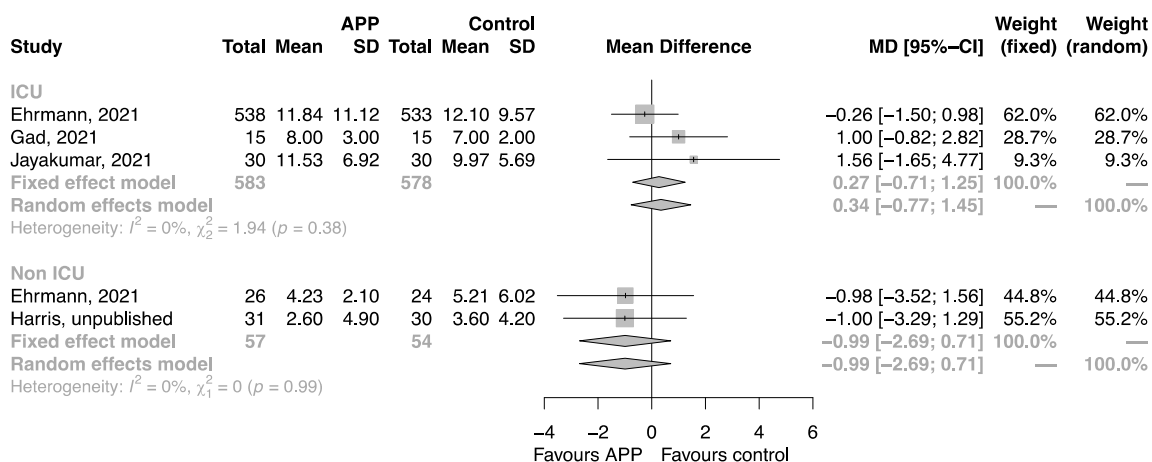

Figure S25. Subgroup analysis of hospital length of stay for included RCTs

**A. Hospital length of stay (Advanced vs. Conventional respiratory support)**

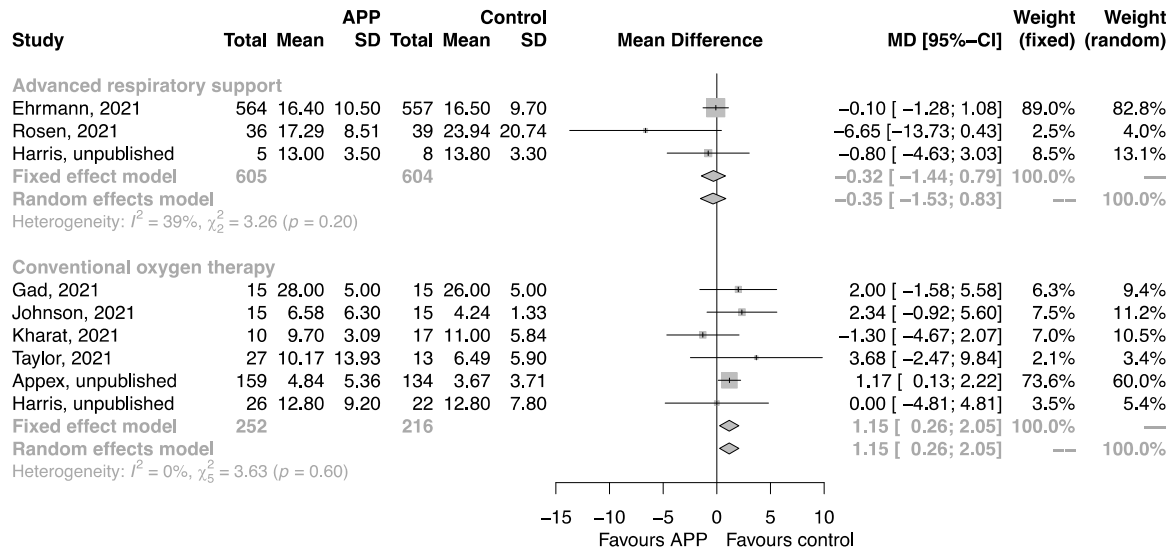

**B. Hospital length of stay (ICU vs. Non ICU)**

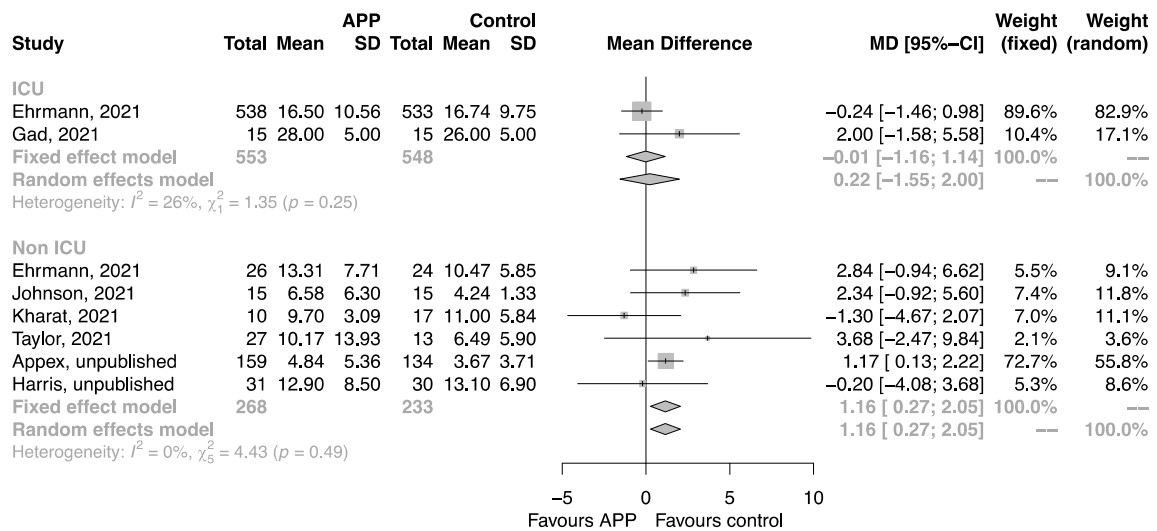

**Figure S26. Trial sequential analysis of need for escalation of respiratory support for included RCTs.**

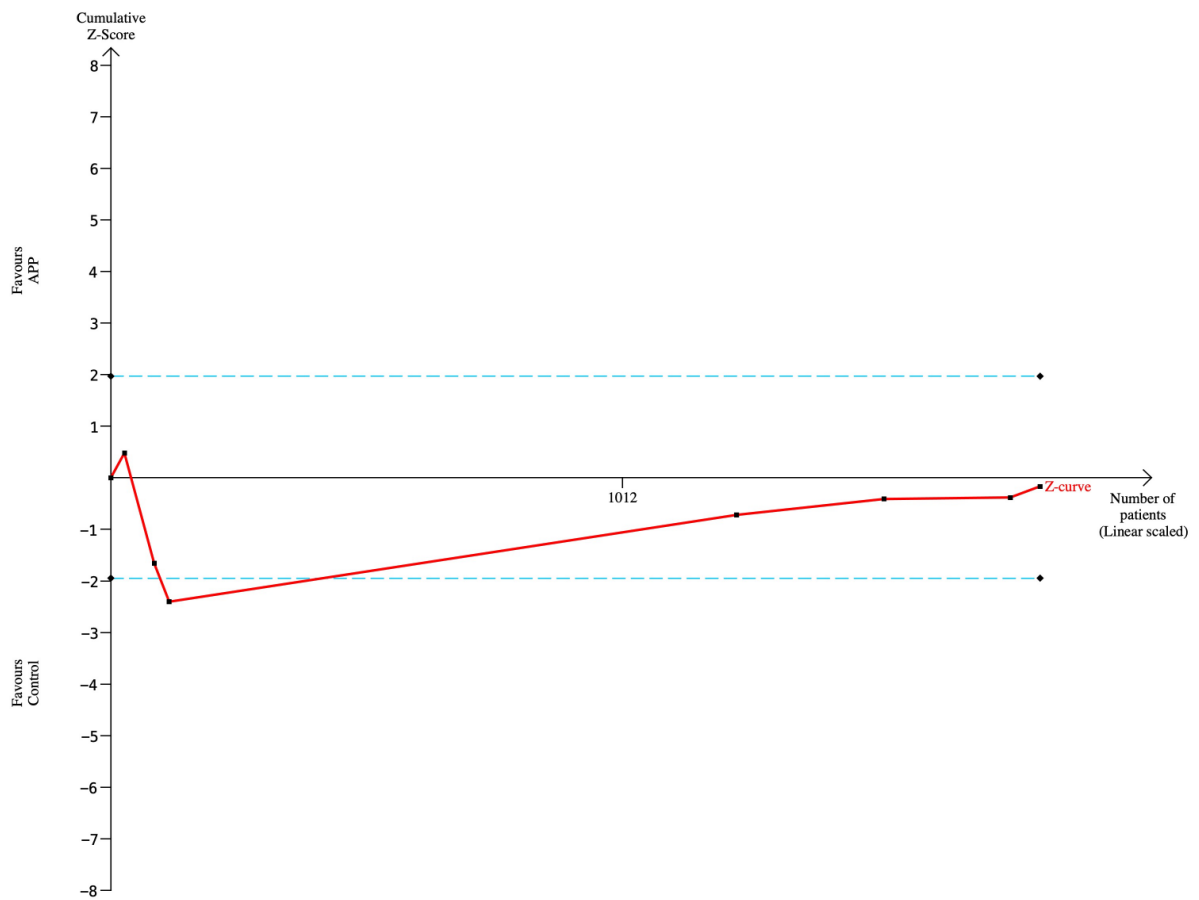



**Figure S27. Trial sequential analysis of need for ICU admission for included RCTs.**

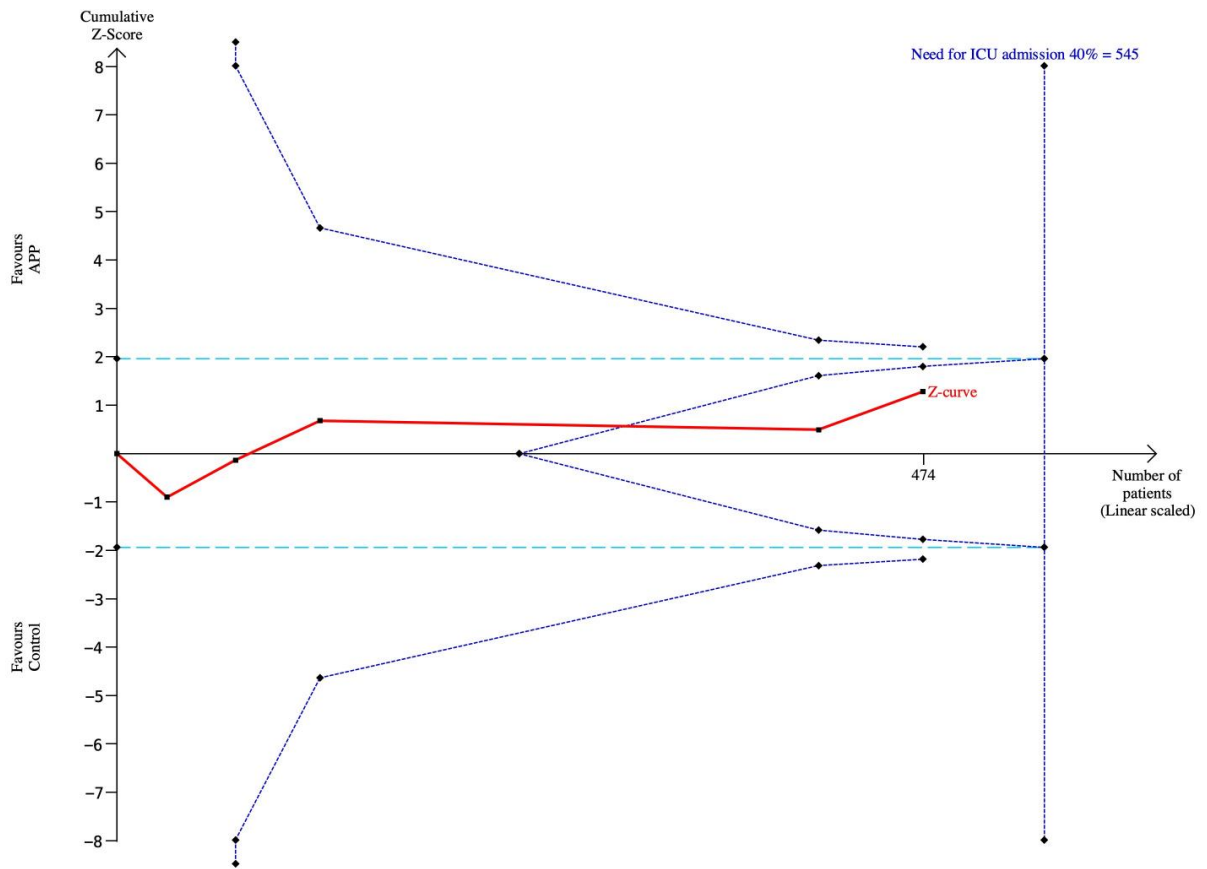

**Figure S28. Trial sequential analysis of ICU length of stay for included RCTs.**

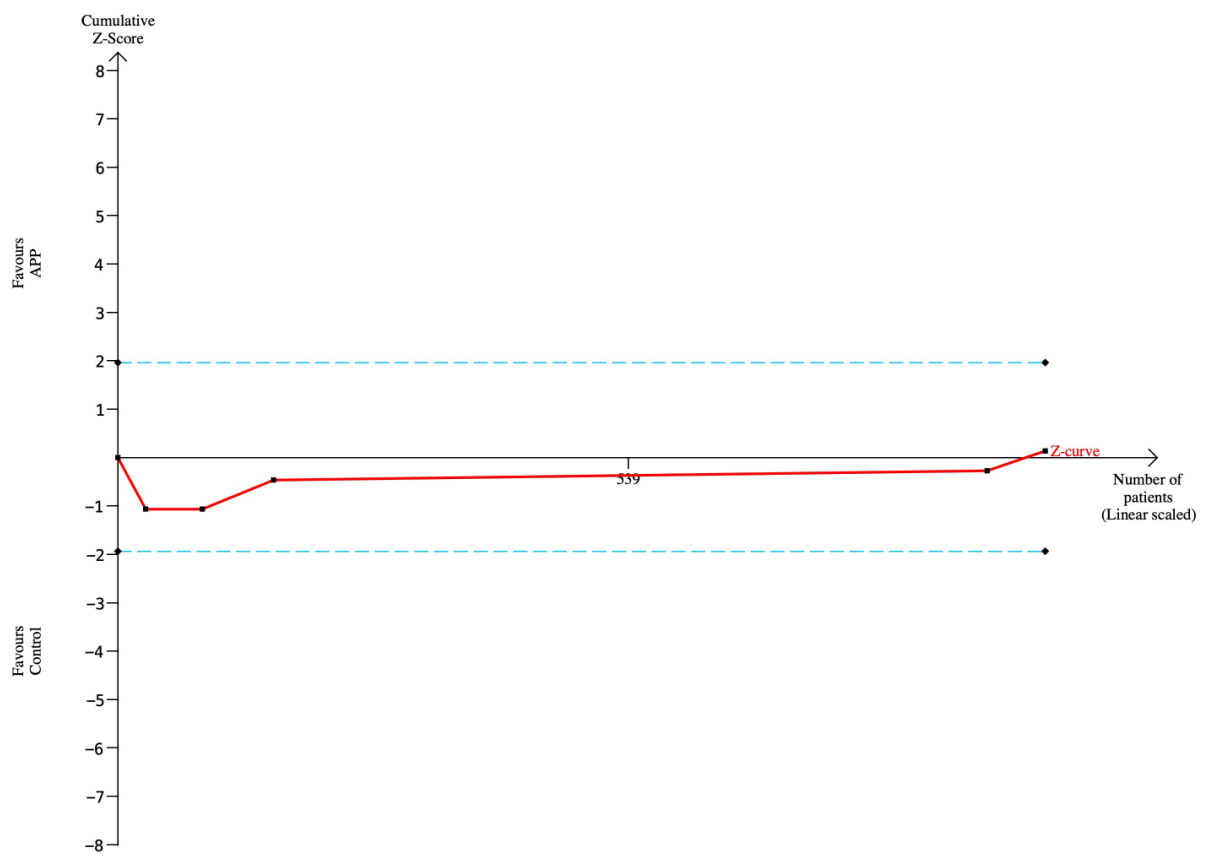

**Figure S29. Trial sequential analysis of hospital length of stay for included RCTs.**

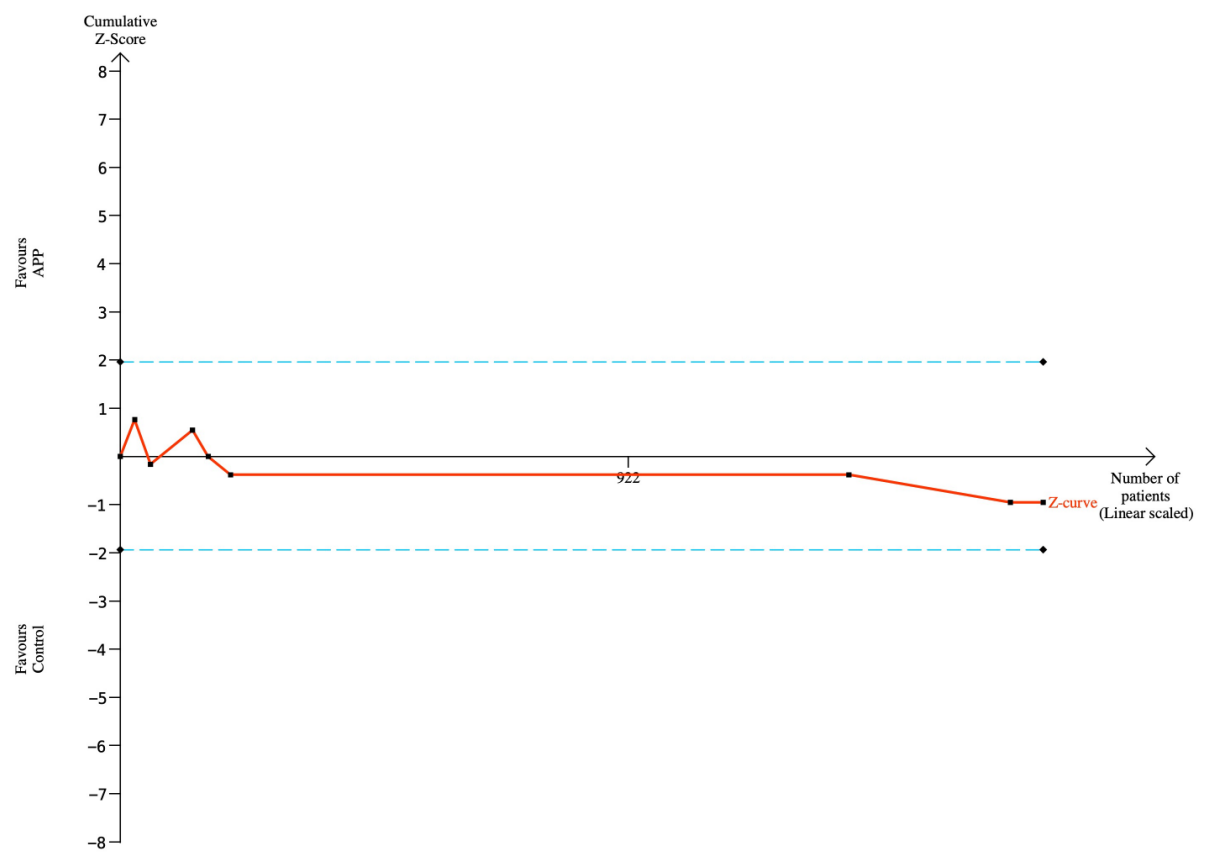

Figure S30. Secondary outcomes for non-RCTs.

### A Need for escalation of respiratory support

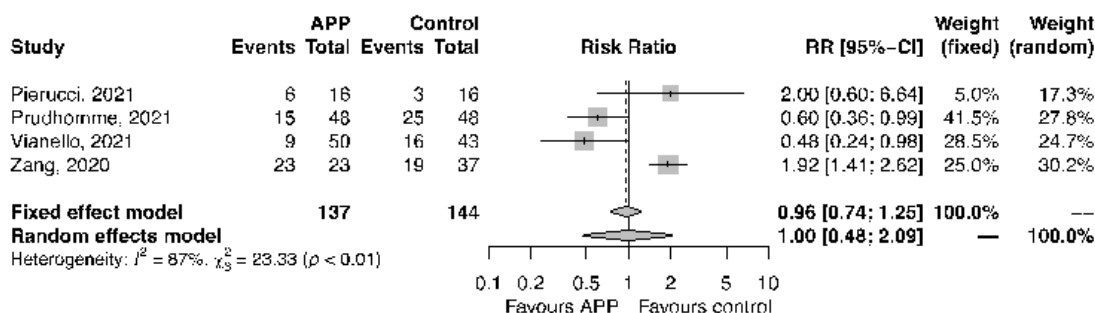

### C Need for ICU admission

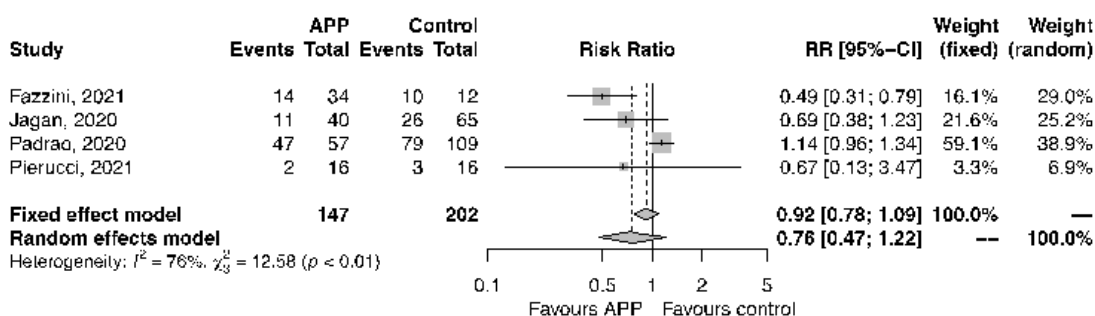

### D ICU length of stay

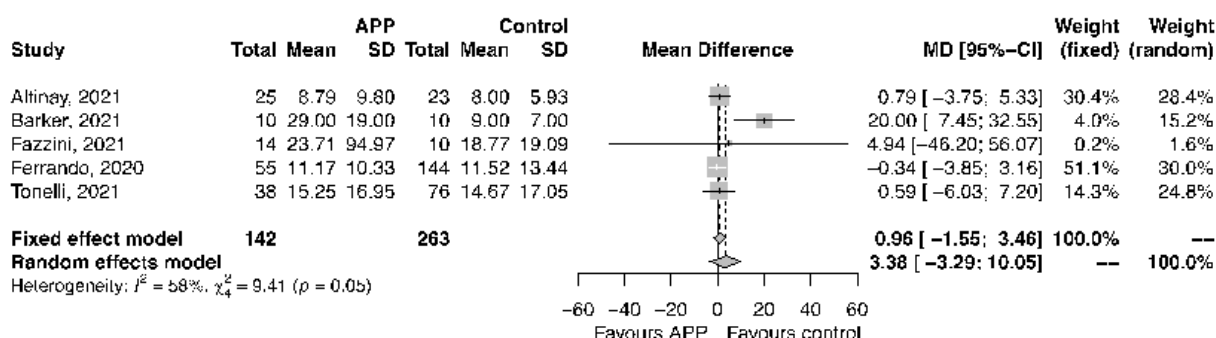

### F Hospital length of stay

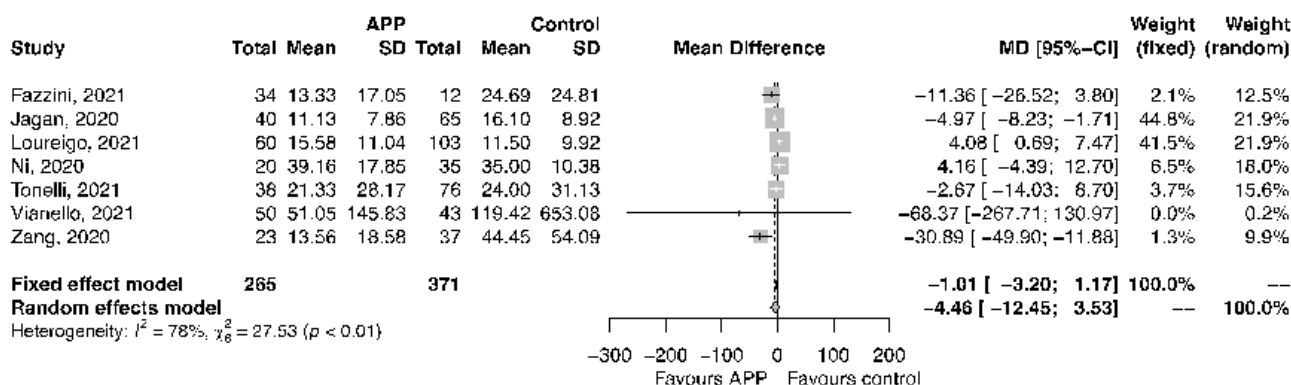

**Table S6. Adverse events of the included RCTs.**

| Author, year         | Interventions                                            | Population | Skin breakdown<br>(n, %) | Vomiting<br>(n, %) | Central or arterial line dislodgement<br>(n, %) | Cardiac arrest at any time<br>(n, %) | Back pain<br>(n, %) | Bloating sensation<br>(n, %) | Discomfort<br>(n, %) |
|----------------------|----------------------------------------------------------|------------|--------------------------|--------------------|-------------------------------------------------|--------------------------------------|---------------------|------------------------------|----------------------|
| Appex, Unpublished   | COT (Room air/Nasal cannula/Mask/HFNC)                   | 134        |                          |                    |                                                 |                                      |                     |                              | 28 (20.9)            |
|                      | COT (Room air/Nasal cannula/Mask/HFNC)+APP               | 159        |                          |                    |                                                 |                                      |                     |                              | 14 (8.8)             |
| Ehrmann, 2021        | HFNC                                                     | 557        | 10 (1.8)                 | 18 (3.2)           | 17 (3.1)                                        | 1 (0.2)                              |                     |                              |                      |
|                      | HFNC+APP                                                 | 564        | 8 (1.4)                  | 15 (2.7)           | 26 (4.6)                                        | 3 (0.5)                              |                     |                              |                      |
| Gad, 2021            | NRM                                                      | 15         |                          |                    |                                                 |                                      |                     |                              |                      |
|                      | NRM+APP                                                  | 15         |                          |                    |                                                 |                                      |                     |                              |                      |
| Jayakumar, 2021      | Standard care (Face mask/NRM)                            | 30         | 0 (0)                    | 0 (0)              |                                                 |                                      |                     |                              | 0 (0)                |
|                      | Standard care (Nasal Prongs/Face mask/NRM/HFNC/NIV) +APP | 30         | 0 (0)                    | 0 (0)              |                                                 |                                      |                     |                              | 2 (6.7)              |
| Johnson, 2021        | Usual care (Room air/ nasal cannula)                     | 15         |                          |                    |                                                 |                                      |                     |                              |                      |
|                      | Usual care (Room air/nasal cannula)+APP                  | 15         |                          |                    |                                                 |                                      |                     |                              |                      |
| Kharat, 2021         | Usual care (Nasal cannula)                               | 17         | 0 (0)                    | 0 (0)              | 0 (0)                                           | 0 (0)                                | 0 (0)               | 0 (0)                        | 0 (0)                |
|                      | Usual care (Nasal cannula) +APP                          | 10         | 0 (0)                    | 0 (0)              | 0 (0)                                           | 0 (0)                                | 6 (60.0)            | 0 (0)                        | 6 (60.0)             |
| Rosén, 2021          | HFNC/NIV                                                 | 39         | 9 (23.1)                 | 0 (0)              | 0 (0)                                           | 1 (2.6)                              |                     |                              |                      |
|                      | HFNC/NIV+APP                                             | 36         | 2 (5.6)                  | 1 (2.8)            | 0 (0)                                           | 2 (5.6)                              |                     |                              |                      |
| Taylor, 2021         | Usual care (Room air/ nasal cannula/HFNC/NIV)            | 13         | 0 (0)                    |                    | 0 (0)                                           | 0 (0)                                |                     |                              |                      |
|                      | Usual care (Nasal cannula/HFNC/NIV)+APP                  | 27         | 0 (0)                    |                    | 0 (0)                                           | 0 (0)                                |                     |                              |                      |
| Harris, Unpublished  | Usual care (Nasal cannula/NRM/HFNC/NIV)                  | 30         | 0 (0)                    | 0 (0)              | 0 (0)                                           | 0 (0)                                | 1 (3.3)             |                              |                      |
|                      | Usual care (Nasal cannula/NRM/HFNC/NIV)+APP              | 31         | 0 (0)                    | 0 (0)              | 0 (0)                                           | 0 (0)                                | 0 (0)               |                              |                      |
| Fralick, Unpublished | Standard care (Nasal cannula/ venturi mask/HFNC)         | 122        |                          |                    |                                                 |                                      |                     |                              |                      |
|                      | Standard care (Nasal cannula/ venturi mask/HFNC)+APP     | 126        |                          |                    |                                                 |                                      |                     |                              |                      |

Missing data was presented as blank. APP, awake prone positioning; COT, conventional oxygen therapy; HFNC, high-flow nasal cannula; NIV, non-invasive ventilation; NRM, non-rebreather mask; RCT, randomised controlled trial.

**Table S7. Adverse events of the included non-RCTs.**

| Author, year         | Interventions                                                               | Population | Skin breakdown<br>(n, %) | Vomiting<br>(n, %) | Central or arterial line dislodgement<br>(n, %) | Cardiac arrest at any time<br>(n, %) | Back pain<br>(n, %) | Bloating sensation<br>(n, %) | Discomfort<br>(n, %) |
|----------------------|-----------------------------------------------------------------------------|------------|--------------------------|--------------------|-------------------------------------------------|--------------------------------------|---------------------|------------------------------|----------------------|
| Alsharif, 2021       | Usual care (CPAP)                                                           | 48         |                          |                    |                                                 |                                      |                     |                              |                      |
|                      | Usual care (CPAP)+APP                                                       | 31         |                          |                    |                                                 |                                      |                     |                              |                      |
| Altinay, 2021        | Usual care (NRM)                                                            | 23         |                          |                    |                                                 |                                      |                     |                              |                      |
|                      | Usual care (NRM)+APP                                                        | 25         |                          |                    |                                                 |                                      |                     |                              |                      |
| Barker, 2021         | Usual care (NIV)                                                            | 10         |                          |                    |                                                 |                                      |                     |                              |                      |
|                      | Usual care (NIV)+APP                                                        | 10         |                          |                    |                                                 |                                      |                     |                              |                      |
| Fazzini, 2021        | Usual care<br>(HFNC/Facemask/CPAP)+APP<1h                                   | 12         |                          |                    |                                                 |                                      |                     |                              |                      |
|                      | Usual care<br>(HFNC/Facemask/CPAP)+APP>1h                                   | 34         |                          |                    |                                                 |                                      |                     |                              |                      |
| Ferrando, 2020       | Usual care (HFNC)                                                           | 144        |                          |                    |                                                 |                                      |                     |                              |                      |
|                      | Usual care (HFNC)+APP                                                       | 55         |                          |                    |                                                 |                                      |                     |                              |                      |
| Jagan, 2020          | APP<1h or <5 occasions per day and for<br><= 1 continuous hour overnight    | 65         |                          |                    |                                                 |                                      |                     |                              |                      |
|                      | APP>=1h orn >=5 occasions per day and<br>for >= 1 continuous hour overnight | 40         |                          |                    |                                                 |                                      |                     |                              |                      |
| Padrão, 2020         | Usual care (Nasal cannula/Venturi<br>mask/NRM)                              | 109        |                          |                    |                                                 | 0 (0%)                               |                     |                              |                      |
|                      | Usual care (Nasal cannula/Venturi<br>mask/NRM) +APP                         | 57         |                          |                    |                                                 | 0 (0%)                               | 3 (5.3)             |                              |                      |
| Jouffroy, 2021       | Usual care (COT/HFNC/NIV/CPAP)                                              | 339        |                          |                    |                                                 |                                      |                     |                              |                      |
|                      | Usual care (COT/HFNC/CPAP)+APP                                              | 40         |                          |                    |                                                 |                                      |                     |                              |                      |
| Loureiro-Amigo, 2021 | Usual care                                                                  | 103        |                          |                    |                                                 |                                      |                     |                              |                      |
|                      | Usual care+APP                                                              | 60         |                          |                    |                                                 |                                      |                     |                              |                      |
| Meredith, 2020       | Non-self proning                                                            | 87         |                          |                    |                                                 |                                      |                     |                              |                      |
|                      | Self-proning                                                                | 26         |                          |                    |                                                 |                                      |                     |                              |                      |
| Ni, 2021             | Usual care                                                                  | 35         | 0 (0%)                   |                    |                                                 |                                      |                     |                              |                      |
|                      | Usual care+APP                                                              | 20         | 0 (0%)                   |                    |                                                 |                                      |                     |                              |                      |
| Pierucci, 2021       | Usual care (HFNC/CPAP/NIV)                                                  | 16         |                          |                    |                                                 |                                      |                     |                              |                      |
|                      | Usual care (HFNC/CPAP/NIV)+APP                                              | 16         |                          |                    |                                                 |                                      |                     |                              |                      |
| Perez-Nieto, 2021    | Usual care (Nasal cannula/NRM/HFNC)                                         | 322        |                          |                    |                                                 |                                      |                     |                              |                      |
|                      | Usual care (Nasal cannula/NRM/HFNC)<br>+APP                                 | 505        |                          |                    |                                                 |                                      |                     |                              |                      |
| Sryma, 2021          | Usual care (COT/HFNC/NIV)                                                   | 15         |                          |                    |                                                 |                                      | 0 (0%)              | 0 (0%)                       |                      |
|                      | Usual care (COT/HFNC/NIV)+APP                                               | 30         |                          |                    |                                                 |                                      | 2 (6.6)             | 2 (6.7)                      |                      |
| Vianello, 2021       | Usual care (HFNC)                                                           | 43         |                          |                    |                                                 |                                      |                     |                              |                      |
|                      | Usual care (HFNC)+APP                                                       | 50         |                          |                    |                                                 |                                      |                     |                              |                      |
| Prud'homme, 2021     | Usual care (COT/HFNC)                                                       | 48         |                          |                    |                                                 |                                      |                     |                              |                      |
|                      | Usual care (COT/HFNC)+APP                                                   | 48         |                          |                    |                                                 |                                      |                     |                              |                      |
| Simioli, 2021        | Usual care (HFNC/CPAP)                                                      | 11         |                          |                    |                                                 |                                      |                     |                              |                      |
|                      | Usual care (HFNC/CPAP)+APP                                                  | 18         |                          |                    |                                                 |                                      |                     |                              |                      |
| Tonelli, 2021        | Usual care (HFNC/NIV)                                                       | 76         |                          |                    |                                                 |                                      |                     |                              |                      |
|                      | Usual care (HFNC/NIV)+APP                                                   | 38         |                          |                    |                                                 |                                      |                     |                              |                      |
| Zang, 2020           | Usual care (Face mask)                                                      | 37         |                          |                    |                                                 |                                      |                     |                              |                      |
|                      | Usual care (Face mask)+APP                                                  | 23         |                          |                    |                                                 |                                      |                     |                              |                      |

Missing data was presented as blank. APP, awake prone positioning; COT, conventional oxygen therapy; CPAP, continuous positive airway pressure; HFNC, high-flow nasal cannula; NIV, non-invasive ventilation; NRM, non-rebreather mask; RCT, randomised controlled trial.

**Table S8. Demographical details of the induced RCTs.**

| Author, year          | Country                                     | Enrolment location                            | Study design       | Interventions                                         | Population | Targeting duration of APP                                                      | Actual duration of APP (hours) | Age (years)           | Sex (Male, %) | BMI (kg/m <sup>2</sup> ) | Baseline P/F or S/F* | Use of corticosteroids (n, %) | Primary outcomes                                                                                                                                                                                         | Follow up (days)              | Secondary outcomes                                                                                                                                                                                                                                                                                                                                                                                             |
|-----------------------|---------------------------------------------|-----------------------------------------------|--------------------|-------------------------------------------------------|------------|--------------------------------------------------------------------------------|--------------------------------|-----------------------|---------------|--------------------------|----------------------|-------------------------------|----------------------------------------------------------------------------------------------------------------------------------------------------------------------------------------------------------|-------------------------------|----------------------------------------------------------------------------------------------------------------------------------------------------------------------------------------------------------------------------------------------------------------------------------------------------------------------------------------------------------------------------------------------------------------|
| APPEX-19, Unpublished | USA                                         | General ward                                  | RCT, multicenter   | Usual care (Room air/Nasal cannula/Mask/HFNC)         | 134        | Up to four 1-2h daily sessions, and up to 12h nightly                          |                                | 54 (43-63)            | 80 (59-7)     |                          | 402 (311-457)*       |                               | Progression of ARF, composite outcome of either respiratory deterioration (progression to NRB/HFNC/NIV/IMV or requiring increase in O <sub>2</sub> ≥2L/min compared to baseline) or admission to the ICU | 14 (or until discharge/death) | Respiratory deterioration, admission to the ICU, receipt of IMV, hospital mortality, diagnosis of ARDS, median self-reported dyspnea (Borg), safety outcomes, and compliance with APP                                                                                                                                                                                                                          |
|                       |                                             |                                               |                    | Usual care (Room air/Nasal cannula/Mask/HFNC)+APP     | 159        |                                                                                |                                | 52 (39-62)            | 96 (60-4)     |                          | 396 (308-457)*       |                               |                                                                                                                                                                                                          |                               |                                                                                                                                                                                                                                                                                                                                                                                                                |
| Ehrmann, 2021         | USA, Mexico, Canada, Ireland, France, Spain | ICU, intermediate care unit, ED, General ward | RCT, multicenter   | Usual care (HFNC)                                     | 557        | As long and as frequently as possible                                          | Daily: 0 (0-0)                 | 60·7 ±14·0            | 366 (65·7)    | 29·7± 4·6                | 117·3 ±37·2          | 492 (88·3)                    | Treatment failure within 28 days of enrolment, defined as intubation or death                                                                                                                            | 28                            | Intubation, mortality, use of NIV, length of hospital stay, time to HFNC weaning in patients with treatment success, duration of invasive mechanical ventilation among intubated patients surviving to day 28, mortality in invasively mechanically ventilated patients, predefined safety outcomes, and physiological response to APP, including the ratio of S/F to respiratory rate, known as the ROX index |
|                       |                                             |                                               |                    | Usual care (HFNC)+APP                                 | 564        |                                                                                |                                | 61·5 ±13·3            | 380 (67·4)    | 29·7± 4·6                | 119·3 ±43·3          | 494 (87·6)                    |                                                                                                                                                                                                          |                               |                                                                                                                                                                                                                                                                                                                                                                                                                |
| Gad, 2021             | Egypt                                       | ICU                                           | RCT, single center | Usual care (NRM)                                      | 15         | 1-2 hours each session, 3 hours apart during waking hours for the first 3 days |                                | 46·0 (33-51)          | 8 (53·3)      |                          | 111·0 (97·0-175·0)   |                               | Improvement of oxygenation and avoidance of intubation within the first 3 days of critical care admission                                                                                                |                               | ICU stay and hospital stay                                                                                                                                                                                                                                                                                                                                                                                     |
|                       |                                             |                                               |                    | Usual care (NRM)+APP                                  | 15         |                                                                                |                                | 49·0 (38-62)          | 9 (60·0)      |                          | 126·0 (88·0-164·0)   |                               |                                                                                                                                                                                                          |                               |                                                                                                                                                                                                                                                                                                                                                                                                                |
| Jayakumar, 2021       | India                                       | ICU                                           | RCT, multicenter   | Usual care (Nasal cannula/Face mask/NRM/HFNC/NIV)     | 30         | At least 6 hours a day                                                         |                                | 57·3±12·1             | 25 (83·3)     | 25·8±2·6                 | 185·6±126·1          | 30 (100·0)                    | The proportion of patients adhering to the protocol                                                                                                                                                      | Until discharge               | Proportion of patients requiring escalation of respiratory support, number of hours prone and maximum hours of continuous prone positioning in a day, length of stay in ICU, ICU mortality, adverse events                                                                                                                                                                                                     |
|                       |                                             |                                               |                    | Usual care (Nasal cannula/Face mask/NRM/HFNC/NIV)+APP | 30         |                                                                                |                                | 54·8±11·1             | 25 (83·3)     | 28·2±5·7                 | 201·4±118·8          | 30(100·0)                     |                                                                                                                                                                                                          |                               |                                                                                                                                                                                                                                                                                                                                                                                                                |
| Johnson, 2021         | USA                                         | General ward                                  | RCT, single center | Usual care (Room air/ nasal cannula)                  | 15         | Every 4 hours with a duration of 1-2 hours or as long as tolerated             |                                | 62 (49-75)            | 8 (53·3)      | 29·3 (24·4-32·9)         |                      |                               | The change in P/F at 72 hours after admission                                                                                                                                                            | 28                            | The change of P/F at 48 hours; need for endotracheal intubation; ICU transfer; escalation in oxygen delivery system; length of stay; ventilator-free days; in-hospital mortality                                                                                                                                                                                                                               |
|                       |                                             |                                               |                    | Usual care (Room air/nasal cannula)+APP               | 15         |                                                                                |                                | 52 (40-65)            | 8 (53·3)      | 32·9 (27·5-39·4)         |                      |                               |                                                                                                                                                                                                          |                               |                                                                                                                                                                                                                                                                                                                                                                                                                |
| Kharat, 2021          | Switzerland                                 | General ward                                  | RCT, single center | Usual care (Nasal cannula)                            | 17         | Self-proning for 12 hours per day and alternate body position every 4 hours    |                                | Total: 60±11          | 11 (64·7)     | 27·3±4·2                 | 336 (303-388)*       |                               | Oxygen needs assessed by nasal cannula oxygen flow at 24 hours                                                                                                                                           | 28                            | S/F ratio at 24 h, respiratory and heart rate at 24 h, patient trajectory (transfer to critical care unit) and potential intervention-related adverse effects as defined by neck pain, position-related discomfort and gastro-oesophageal reflux, intubation, death at 28 days                                                                                                                                 |
|                       |                                             |                                               |                    | Usual care (Nasal cannula)+APP                        | 10         |                                                                                |                                | Total: 4·9 ± 3·6      | 54±14         | 6 (60·0)                 | 29·7±5·3             |                               |                                                                                                                                                                                                          |                               |                                                                                                                                                                                                                                                                                                                                                                                                                |
| Rosén, 2021           | Sweden                                      | ICU, general ward                             | RCT, multicenter   | Usual care (HFNC/NIV)                                 | 39         | At least 16 hours per day                                                      |                                | Daily: 3·4 (1·8-8·4)  | 65 (55-70)    | 32 (82·1)                | 29 (27-33)           | 115·5 (93·75-129·75)          | Intubation within 30 days after enrolment                                                                                                                                                                | 30                            | Duration of APP, use of NIV, time to NIV for patients included with HFNO, use of vasopressors/inotropes, CRRT, ECMO, ventilator-free days, days                                                                                                                                                                                                                                                                |
|                       |                                             |                                               |                    | Usual care (HFNC/NIV)+APP                             | 36         |                                                                                |                                | Daily: 9·0 (4·4-10·6) | 66 (53-74)    | 23 (63·9)                | 28 (25-30)           | 115·5 (86·25-130·5)           |                                                                                                                                                                                                          |                               |                                                                                                                                                                                                                                                                                                                                                                                                                |

|                      |             |              |                    |                                                   |     |                                                                                                         |                                                                                                                                            |              |            |                |            |                                                                                                                                                          |                                                                                                                                                 |                                                                                                                                                                                                                                                                                                                                                                                                                                                           |
|----------------------|-------------|--------------|--------------------|---------------------------------------------------|-----|---------------------------------------------------------------------------------------------------------|--------------------------------------------------------------------------------------------------------------------------------------------|--------------|------------|----------------|------------|----------------------------------------------------------------------------------------------------------------------------------------------------------|-------------------------------------------------------------------------------------------------------------------------------------------------|-----------------------------------------------------------------------------------------------------------------------------------------------------------------------------------------------------------------------------------------------------------------------------------------------------------------------------------------------------------------------------------------------------------------------------------------------------------|
|                      |             |              |                    |                                                   |     |                                                                                                         |                                                                                                                                            |              |            |                |            |                                                                                                                                                          | free of NIV/HFNO, hospital and ICU length of stay, 30-day mortality, WHO-ordinal scale for clinical improvement at day 7 and 30, adverse events |                                                                                                                                                                                                                                                                                                                                                                                                                                                           |
| Taylor, 2021         | USA         | General ward | RCT, single center | Usual care (Room air/ nasal cannula/HFNC/NIV)     | 13  |                                                                                                         | 60 (54-63)                                                                                                                                 | 10 (76-9)    | 31 (28-38) |                | 9 (69-2)   | Outcomes relative to successful implementation of a future definitive RCT                                                                                | Until discharge/death                                                                                                                           | S/F, time on S/F <315, receipt of intensive care, oxygen flow >6L/min, intubation, hospital length of stay, hospital mortality at 48 hours, safety outcomes                                                                                                                                                                                                                                                                                               |
|                      |             |              |                    | Usual care (Nasal cannula/HFNC/NIV)+APP           | 27  |                                                                                                         | 56 (45-66)                                                                                                                                 | 17 (63-0)    | 29 (26-39) |                | 19 (70-4)  |                                                                                                                                                          |                                                                                                                                                 |                                                                                                                                                                                                                                                                                                                                                                                                                                                           |
| Harris, Unpublished  | Qatar       | General ward | RCT, multicenter   | Usual care (Nasal cannula/NRM/HFNC/NIV)           | 30  |                                                                                                         | 40 (36-45)                                                                                                                                 | 25 (83-3)    | 27-2±4-6   | 196 (182-240)* | 30 (100-0) | Escalation of respiratory support within the 30 days of the study                                                                                        | 30                                                                                                                                              | Incidence of intubation within 30 days of enrolment; Use of NP, HM, NRB, NIV and IMV in each group in 1st 3 days of study; Physiological response to prone averaged over days 1-3; PF or SF ratio and ROX index at baseline, 1 hour after first prone and daily for 4 days; Length of time tolerating proning; 28-day Mortality; Length of stay in ICU and hospital; Duration of invasive mechanical ventilation; Displacement of devices; Adverse events |
|                      |             |              |                    | Usual care (Nasal cannula/NRM/HFNC/NIV)+APP       | 31  | At least 3 hours and up to 16 hours per day                                                             | 41 (35-50)                                                                                                                                 | 29 (93-5)    | 28-4±3-7   | 196 (165-245)* | 31 (100-0) |                                                                                                                                                          |                                                                                                                                                 |                                                                                                                                                                                                                                                                                                                                                                                                                                                           |
| Fralick, Unpublished | Canada, USA | General ward | RCT, multicenter   | Usual care (Nasal cannula/ venturi mask/HFNC)     | 122 |                                                                                                         | 54 (44-62)                                                                                                                                 | 82 (65.1)    |            | 305 (267-339)* | 119 (97.5) | A composite of in-hospital death, mechanical ventilation, or worsening respiratory failure defined as requiring at least 60% FiO2 for more than 24 hours | 30                                                                                                                                              | The components of the composite analyzed individually; time spent in prone position; change in S/F; time to recovery (defined as being on room air for at least 24 hours); time-to-discharge from hospital and the rate of serious adverse events                                                                                                                                                                                                         |
|                      |             |              |                    | Usual care (Nasal cannula/ venturi mask/HFNC)+APP | 126 | Four times per day (up to 2 hours for each session) and encouraged to sleep in prone position overnight | Total: 0 (0-2) [first 72 hrs]; 0 (0-0) [From 72 hours to 7 days]<br>Total: 6 (1.5-12.8) [first 72 hrs]; 0 (0-12) [From 72 hours to 7 days] | 59.5 (45-68) | 77 (63.1)  | 303 (261-336)* | 117 (92.9) |                                                                                                                                                          |                                                                                                                                                 |                                                                                                                                                                                                                                                                                                                                                                                                                                                           |

Data was presented as mean±SD or median (IQR). Missing data was presented as blank \* Data was shown at S/F. APP, awake prone positioning; ARDS, acute respiratory distress syndrome; ARF, acute respiratory failure; BMI, body mass index; COT, conventional oxygen therapy; CRRT, continuous renal replacement therapy; ECMO, extracorporeal membrane oxygenation; ED, emergency department; HFNC, high flow nasal cannula; HM, Hudson mask; ICU, intensive care unit; IMV, invasive mechanical ventilation; NIV, non-invasive ventilation; NP, nasal prongs, NRM, non-rebreather mask; P/F, ratio of partial pressure of arterial oxygen to fraction of inhaled oxygen; RCT, randomized controlled trial; S/F, ratio of pulse oxygen saturation to fraction of inhaled oxygen.
